# Supplementary material for: Direct synthesis of tetrahydropyran-4-ones via O3ReOH-catalyzed Prins cyclization of 3-chlorohomoallylic alcohols
Source: Royal Society of Chemistry journal article supplement (doi:10.1039/d2ob01941h), 2022-01-01
Supplement: d2ob01941h1.pdf [file d2ob01941h1.pdf]

## Supplementary Information

### Direct synthesis of tetrahydropyran-4-ones via O<sub>3</sub>ReOH-catalyzed Prins cyclization of 3-chlorohomoallylic alcohols

Kwanruthai Tadpetch <sup>a\*</sup>, Pongsit Vijitphan <sup>a,b</sup>, Sasiwan Kaewsen <sup>a</sup>, Aticha Thiraporn <sup>a</sup>,  
Vatcharin Rukachaisirikul <sup>a\*</sup>

<sup>a</sup> *Division of Physical Science and Center of Excellence for Innovation in Chemistry, Faculty of Science, Prince of Songkla University, Hat Yai, Songkhla 90110, Thailand*

<sup>b</sup> *Current address: Department of Chemistry, Laboratory of Organic Synthesis, Chulabhorn Research Institute, Bangkok 10210, Thailand*

\* Corresponding author. Tel.: +66 74 288437; fax: +66 74 558403.  
Email address: [kwanruthai.t@psu.ac.th](mailto:kwanruthai.t@psu.ac.th) (K. Tadpetch).

### List of supplementary information

|                                                   | Page |
|---------------------------------------------------|------|
| 1. General Experimental Details                   | 2    |
| 2. Characterization Data                          | 2    |
| 3. <sup>1</sup> H and <sup>13</sup> C NMR Spectra | 15   |
| 4. NOE Spectra of Selected Compounds              | 45   |
| 5. References                                     | 46   |

Unless otherwise stated, all reactions were conducted under a nitrogen or argon atmosphere in oven- or flamed-dried glassware. Solvents were used as received from suppliers or distilled prior to use using standard procedures. Perrhenic acid solution (75-80 wt. % in H<sub>2</sub>O) was purchased from Sigma-Aldrich. All other reagents were obtained from commercial sources and used without further purification. Chlorohomoallylic alcohols **21a**, **21b** and **21c** were prepared following Li's protocol<sup>1</sup> using 2-chloro-2-propene and dihydrocinnamaldehyde, cyclohexanecarboxaldehyde and benzaldehyde respectively. Column chromatography was performed on Silica gel 60 (0.063-0.200 mm, Merck). Thin-layer chromatography (TLC) was performed on Silica gel 60 F<sub>254</sub> (Merck). <sup>1</sup>H and <sup>13</sup>C NMR spectroscopic data were recorded at ambient temperature on 300 or 500 MHz Bruker FTNMR Ultra Shield spectrometers. <sup>1</sup>H NMR spectra are reported in ppm on the  $\delta$  scale and referenced to the internal tetramethylsilane. The data are presented as follows: chemical shift, multiplicity (s = singlet, d = doublet, t = triplet, q = quartet, m = multiplet, br = broad, app = apparent), coupling constant(s) in hertz (Hz), and integration. <sup>13</sup>C NMR spectra were reported in ppm relative to CDCl<sub>3</sub> (77.16 ppm). Infrared (IR) spectra were recorded on a Perkin Elmer 783 FTS165 FT-IR spectrometer. High-resolution mass spectra were obtained on a Ultra-Performance Liquid Chromatography–High Resolution Mass Spectrometer (Agilent LC-QTOF 6500 system), Mae Fah Luang University or a High-Performance Liquid Chromatograph–Mass Spectrometer (Shimadzu LCMS-IT-TOF Model LC-20ADXR), Thammasat University. Melting points were measured using an Electrothermal IA9200 melting point apparatus and are uncorrected.

## 2. Characterization Data

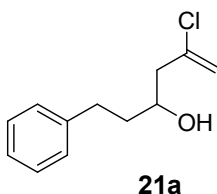

**5-Chloro-1-phenylhex-5-en-3-ol (21a).** Light yellow oil:  $R_f = 0.50$  (20% EtOAc/hexanes); <sup>1</sup>H NMR (300 MHz, CDCl<sub>3</sub>)  $\delta$  7.38–7.24 (m, 2H), 7.24–7.12 (m, 3H), 5.28 (d,  $J = 0.9$  Hz, 1H), 5.24 (app s, 1H), 3.97 (tt,  $J = 6.6, 6.0$  Hz, 1H), 2.90–2.60 (m, 2H), 1.92–1.76 (m, 2H); <sup>13</sup>C NMR (75 MHz, CDCl<sub>3</sub>)  $\delta$  141.8, 139.3, 128.47, 128.45,

126.0, 115.1, 68.2, 47.3, 38.2, 32.0.  $^1\text{H}$  and  $^{13}\text{C}$  NMR data matched those previously reported by Leighton et al.<sup>2</sup>

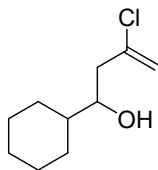

**21b**

**3-Chloro-1-cyclohexylbut-3-en-1-ol (21b).** Light yellow oil:  $R_f = 0.55$  (20% EtOAc/hexanes);  $^1\text{H}$  NMR (300 MHz,  $\text{CDCl}_3$ )  $\delta$  5.28 (s, 1H), 5.26 (s, 1H), 3.71 (ddd,  $J = 9.0, 5.4, 3.6$  Hz, 1H), 2.51 (ddd,  $J = 14.4, 3.3, 0.9$  Hz, 1H), 2.41 (dd,  $J = 14.4, 9.0$  Hz, 1H), 1.92–1.66 (m, 5H), 1.45–1.33 (m, 1H), 1.32–0.98 (m, 4H);  $^{13}\text{C}$  NMR (75 MHz,  $\text{CDCl}_3$ )  $\delta$  140.2, 115.0, 72.5, 44.4, 43.1, 29.2, 27.9, 26.5, 26.3, 26.2; IR (thin film): 3384, 2926, 2853, 1636, 1449, 881  $\text{cm}^{-1}$ .

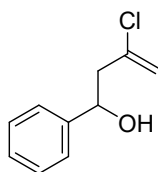

**21c**

**3-Chloro-1-phenylbut-3-en-1-ol (21c).** Light yellow oil:  $R_f = 0.65$  (20% EtOAc/hexanes);  $^1\text{H}$  NMR (300 MHz,  $\text{CDCl}_3$ )  $\delta$  7.36–7.22 (m, 5H), 5.24 (d,  $J = 1.2$  Hz, 1H), 5.18 (app s, 1H), 4.98 (dd,  $J = 8.7, 4.5$  Hz, 1H), 2.73 (dd,  $J = 14.4, 8.7$  Hz, 1H), 2.61 (ddd,  $J = 14.4, 4.5, 0.6$  Hz, 1H), 2.38 (br s, 1H);  $^{13}\text{C}$  NMR (75 MHz,  $\text{CDCl}_3$ )  $\delta$  143.1, 138.9, 128.6, 127.9, 125.9, 115.5, 71.2, 49.2.  $^1\text{H}$  and  $^{13}\text{C}$  NMR data matched those previously reported by Antilla et al.<sup>3</sup>

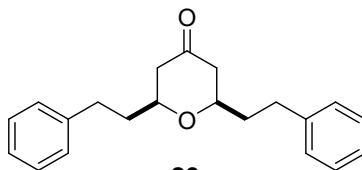

**23a**

**2,6-Diphenethyltetrahydropyran-4-one (23a).** Light yellow oil:  $R_f = 0.42$  (20% EtOAc/hexanes);  $^1\text{H}$  NMR (300 MHz,  $\text{CDCl}_3$ )  $\delta$  7.36–7.27 (m, 4H), 7.27–7.18 (m, 6H), 3.62–3.49 (m, 2H), 2.99–2.85 (m, 2H), 2.85–2.71 (m, 2H), 2.42–2.22 (m, 2H), 2.13–

1.95 (m, 2H), 1.92–1.70 (m, 2H);  $^{13}\text{C}$  NMR (75 MHz,  $\text{CDCl}_3$ )  $\delta$  207.3, 141.5, 128.6, 128.5, 126.1, 75.9, 48.0, 38.1, 31.7.  $^1\text{H}$  and  $^{13}\text{C}$  NMR data matched those previously reported by Scheidt et al.<sup>4</sup>

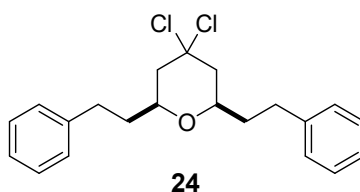

**4,4-Dichloro-2,6-diphenethyltetrahydropyran (24).** Light yellow oil:  $R_f = 0.65$  (20% EtOAc/hexanes);  $^1\text{H}$  NMR (300 MHz,  $\text{CDCl}_3$ )  $\delta$  7.33–7.25 (m, 4H), 7.25–7.16 (m, 6H), 3.70–3.60 (m, 2H), 2.92–2.79 (m, 2H), 2.78–2.65 (m, 2H), 2.47 (d,  $J = 13.8$  Hz, 2H), 2.06 (dd,  $J = 13.8, 11.1$  Hz, 2H), 1.97–1.82 (m, 2H), 1.81–1.68 (m, 2H);  $^{13}\text{C}$  NMR (75 MHz,  $\text{CDCl}_3$ )  $\delta$  141.8, 128.5, 126.0, 87.9, 73.5, 51.5, 37.0, 31.8; IR (thin film): 3026, 2925, 1456, 1093, 750, 698  $\text{cm}^{-1}$ ; HRMS (ES/MeOH):  $m/z$  calcd for  $\text{C}_{21}\text{H}_{25}\text{Cl}_2\text{O}$  ( $\text{M} + \text{H}$ )<sup>+</sup> 363.1282, found 363.1184.

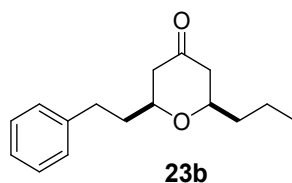

**2-Phenethyl-6-propyltetrahydropyran-4-one (23b).** Light yellow oil:  $R_f = 0.44$  (20% EtOAc/hexanes);  $^1\text{H}$  NMR (300 MHz,  $\text{CDCl}_3$ )  $\delta$  7.33–7.24 (m, 2H), 7.23–7.15 (m, 3H), 3.62–3.45 (m, 2H), 2.90–2.66 (m, 2H), 2.41–2.16 (m, 4H), 2.06–1.91 (m, 1H), 1.86–1.35 (m, 5H), 0.97 (d,  $J = 6.9$  Hz, 3H);  $^{13}\text{C}$  NMR (75 MHz,  $\text{CDCl}_3$ )  $\delta$  207.7, 141.5, 128.6, 128.5, 126.0, 76.8, 75.7, 48.1, 48.0, 38.7, 38.0, 31.6, 18.8, 14.0; IR (thin film): 3026, 2958, 1718, 1456, 750, 700  $\text{cm}^{-1}$ ; HRMS (ES/MeOH):  $m/z$  calcd for  $\text{C}_{16}\text{H}_{22}\text{NaO}_2$  ( $\text{M} + \text{Na}$ )<sup>+</sup> 269.1517, found 269.1514.

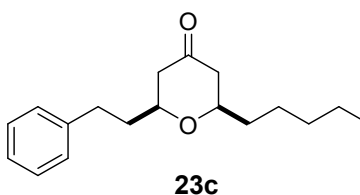

**2-Pentyl-6-phenethyltetrahydropyran-4-one (23c).** Light yellow oil:  $R_f = 0.48$  (20% EtOAc/hexanes);  $^1\text{H}$  NMR (300 MHz,  $\text{CDCl}_3$ )  $\delta$  7.32–7.23 (m, 2H), 7.22–7.14 (m, 3H),

3.57–3.40 (m, 2H), 2.90–2.67 (m, 2H), 2.39–2.12 (m, 4H), 2.05–1.90 (m, 1H), 1.85–1.63 (m, 2H), 1.60–1.25 (m, 7H), 0.92 (d,  $J = 6.9$  Hz, 3H);  $^{13}\text{C}$  NMR (75 MHz,  $\text{CDCl}_3$ )  $\delta$  207.6, 141.5, 128.5, 126.0, 77.0, 75.7, 48.1, 48.0, 38.0, 36.5, 31.7, 31.6, 25.2, 22.6, 14.1; IR (thin film): 2930, 2859, 1719, 1456, 1055, 700  $\text{cm}^{-1}$ ; HRMS (ES/MeOH):  $m/z$  calcd for  $\text{C}_{18}\text{H}_{26}\text{NaO}_2$  ( $\text{M} + \text{Na}$ ) $^+$  297.1830, found 297.1794.

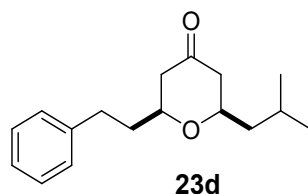

**2-Isobutyl-6-phenethyltetrahydropyran-4-one (23d).** Light yellow oil:  $R_f = 0.46$  (20% EtOAc/hexanes);  $^1\text{H}$  NMR (300 MHz,  $\text{CDCl}_3$ )  $\delta$  7.32–7.23 (m, 2H), 7.22–7.14 (m, 3H), 3.67–3.56 (m, 1H), 3.55–3.45 (m, 1H), 2.92–2.79 (m, 1H), 2.79–2.65 (m, 1H), 2.38–2.15 (m, 4H), 2.15–1.85 (m, 2H), 1.85–1.72 (m, 2H), 1.34–1.22 (m, 2H), 0.95 (t,  $J = 6.6$  Hz, 3H);  $^{13}\text{C}$  NMR (75 MHz,  $\text{CDCl}_3$ )  $\delta$  207.5, 141.5, 128.5, 126.0, 75.9, 75.3, 48.4, 48.1, 45.7, 38.1, 31.7, 24.6, 23.3, 22.2; IR (thin film): 2956, 2927, 1720, 1368, 1055, 700  $\text{cm}^{-1}$ ; HRMS (ES/MeOH):  $m/z$  calcd for  $\text{C}_{17}\text{H}_{24}\text{NaO}_2$  ( $\text{M} + \text{Na}$ ) $^+$  283.1674, found 283.1641.

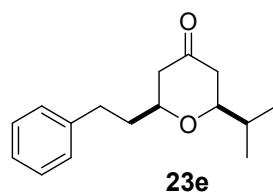

**2-Isopropyl-6-phenethyltetrahydropyran-4-one (23e).** Light yellow oil:  $R_f = 0.46$  (20% EtOAc/hexanes);  $^1\text{H}$  NMR (300 MHz,  $\text{CDCl}_3$ )  $\delta$  7.32–7.23 (m, 2H), 7.22–7.14 (m, 3H), 3.54–3.43 (m, 1H), 3.23 (ddd,  $J = 11.4, 6.6, 2.4$  Hz, 1H), 2.91–2.79 (m, 1H), 2.79–2.66 (m, 1H), 2.43–2.32 (m, 1H), 2.31–2.16 (m, 3H), 2.05–1.90 (m, 1H), 1.88–1.71 (m, 2H), 1.05 (d,  $J = 6.6$  Hz, 3H), 0.94 (d,  $J = 6.9$  Hz, 3H);  $^{13}\text{C}$  NMR (75 MHz,  $\text{CDCl}_3$ )  $\delta$  208.1, 141.6, 128.5, 126.0, 81.9, 75.6, 48.0, 45.3, 38.1, 33.6, 31.6, 18.5, 18.3; IR (thin film): 3026, 2961, 1719, 1456, 1062, 700  $\text{cm}^{-1}$ ; HRMS (ES/MeOH):  $m/z$  calcd for  $\text{C}_{16}\text{H}_{23}\text{O}_2$  ( $\text{M} + \text{H}$ ) $^+$  247.1698, found 247.1630.

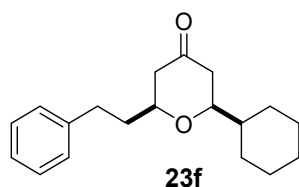

**2-Cyclohexyl-6-phenethyltetrahydropyran-4-one (23f).** Light yellow oil:  $R_f = 0.48$  (20% EtOAc/hexanes);  $^1\text{H NMR}$  (300 MHz,  $\text{CDCl}_3$ )  $\delta$  7.34–7.24 (m, 2H), 7.24–7.15 (m, 3H), 3.53–3.41 (m, 1H), 3.26 (ddd,  $J = 11.4, 6.9, 2.4$  Hz, 1H), 2.91–2.67 (m, 2H), 2.46–2.33 (m, 1H), 2.32–2.17 (m, 3H), 2.14–1.90 (m, 2H), 1.85–1.65 (m, 5H), 1.59–1.39 (m, 1H), 1.38–0.95 (m, 5H);  $^{13}\text{C NMR}$  (75 MHz,  $\text{CDCl}_3$ )  $\delta$  208.2, 141.6, 128.6, 128.5, 126.0, 81.2, 75.6, 48.2, 45.3, 43.4, 38.1, 31.6, 29.0, 28.6, 26.5, 26.1, 26.0; IR (thin film): 2925, 2852, 1718, 1451, 1059, 700  $\text{cm}^{-1}$ ; HRMS (ES/MeOH):  $m/z$  calcd for  $\text{C}_{19}\text{H}_{26}\text{NaO}_2$  ( $\text{M} + \text{Na}$ ) $^+$  309.1830, found 309.1814.

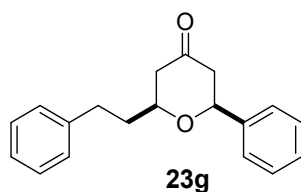

**2-Phenethyl-6-phenyltetrahydropyran-4-one (23g).** Light yellow oil:  $R_f = 0.40$  (20% EtOAc/hexanes);  $^1\text{H NMR}$  (300 MHz,  $\text{CDCl}_3$ )  $\delta$  7.38 (d,  $J = 4.2$  Hz, 4H); 7.36–7.23 (m, 3H), 7.22–7.14 (m, 3H), 4.60 (dd,  $J = 11.4, 3.0$  Hz, 1H), 3.78–3.67 (m, 1H), 2.92–2.70 (m, 2H), 2.68–2.51 (m, 2H), 2.50–2.35 (m, 2H), 2.16–2.01 (m, 1H), 1.96–1.81 (m, 1H);  $^{13}\text{C NMR}$  (75 MHz,  $\text{CDCl}_3$ )  $\delta$  206.6, 141.4, 141.0, 128.6, 128.5, 128.0, 126.0, 125.6, 78.4, 76.2, 49.5, 47.7, 37.9, 31.5; IR (thin film): 3027, 2927, 1718, 1454, 1058, 699  $\text{cm}^{-1}$ ; HRMS (ES/MeOH):  $m/z$  calcd for  $\text{C}_{19}\text{H}_{20}\text{NaO}_2$  ( $\text{M} + \text{Na}$ ) $^+$  303.1361, found 303.1329.

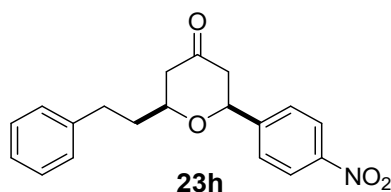

**2-(4-Nitrophenyl)-6-phenethyltetrahydropyran-4-one (23h).** Light yellow oil:  $R_f = 0.30$  (20% EtOAc/hexanes);  $^1\text{H NMR}$  (300 MHz,  $\text{CDCl}_3$ )  $\delta$  8.25 (app d,  $J = 8.7$  Hz, 2H); 7.55 (d,  $J = 8.7$  Hz, 2H); 7.32–7.25 (m, 2H), 7.24–7.16 (m, 3H), 4.73 (dd,  $J = 11.7, 2.7$  Hz, 1H), 3.83–3.72 (m, 1H), 2.94–2.73 (m, 2H), 2.72–2.63 (m, 1H), 2.54–2.40 (m,

3H), 2.20–2.06 (m, 1H), 2.02–1.88 (m, 1H);  $^{13}\text{C}$  NMR (75 MHz,  $\text{CDCl}_3$ )  $\delta$  205.2, 148.1, 147.7, 141.2, 128.6, 128.5, 126.3, 126.2, 124.0, 77.4, 76.5, 49.2, 47.6, 37.8, 31.6; IR (thin film): 2927, 1719, 1519, 1345, 749, 697  $\text{cm}^{-1}$ ; HRMS (ES/MeOH):  $m/z$  calcd for  $\text{C}_{19}\text{H}_{20}\text{NO}_4$  ( $\text{M} + \text{H}$ ) $^+$  326.1392, found 326.1295.

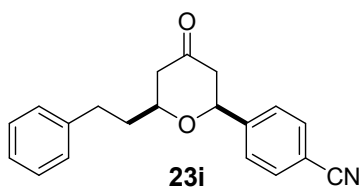

**2-(4-Cyanophenyl)-6-phenethyltetrahydropyran-4-one (23i).** Light yellow oil:  $R_f = 0.20$  (20% EtOAc/hexanes);  $^1\text{H}$  NMR (300 MHz,  $\text{CDCl}_3$ )  $\delta$  7.68 (d,  $J = 5.1$  Hz, 2H); 7.49 (d,  $J = 5.1$  Hz, 2H); 7.30–7.26 (m, 2H), 7.21–7.17 (m, 3H), 4.67 (dd,  $J = 7.2, 1.5$  Hz, 1H), 3.78–3.73 (m, 1H), 2.89–2.83 (m, 1H), 2.81–2.75 (m, 1H), 2.66–2.63 (m, 1H), 2.49–2.39 (m, 3H), 2.15–2.07 (m, 1H), 1.96–1.89 (m, 1H);  $^{13}\text{C}$  NMR (75 MHz,  $\text{CDCl}_3$ )  $\delta$  205.5, 146.1, 141.2, 132.5, 128.5, 128.4, 126.2, 126.1, 118.7, 111.8, 77.4, 76.3, 49.1, 47.5, 37.8, 31.5; IR (thin film): 3026, 2926, 2228, 1721, 1344, 701  $\text{cm}^{-1}$ ; HRMS (ES/MeOH):  $m/z$  calcd for  $\text{C}_{20}\text{H}_{19}\text{NNaO}_2$  ( $\text{M} + \text{Na}$ ) $^+$  328.1313, found 328.1311.

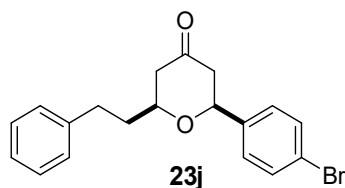

**2-(4-Bromophenyl)-6-phenethyltetrahydropyran-4-one (23j).** Light yellow oil:  $R_f = 0.40$  (20% EtOAc/hexanes);  $^1\text{H}$  NMR (300 MHz,  $\text{CDCl}_3$ )  $\delta$  7.52 (d,  $J = 8.7$  Hz, 2H), 7.32–7.23 (m, 4H), 7.23–7.14 (m, 3H), 4.58 (dd,  $J = 11.4, 2.7$  Hz, 1H), 3.78–3.67 (m, 1H), 2.92–2.71 (m, 2H), 2.66–2.57 (m, 1H), 2.54–2.37 (m, 3H), 2.16–2.02 (m, 1H), 1.97–1.83 (m, 1H);  $^{13}\text{C}$  NMR (75 MHz,  $\text{CDCl}_3$ )  $\delta$  206.3, 141.3, 140.0, 131.8, 128.6, 128.5, 127.4, 126.1, 121.9, 77.8, 76.3, 49.4, 47.7, 37.9, 31.5; IR (thin film): 3026, 2927, 1718, 1489, 1070, 700  $\text{cm}^{-1}$ ; HRMS (ES/MeOH):  $m/z$  calcd for  $\text{C}_{19}\text{H}_{20}\text{BrO}_2$  ( $\text{M} + \text{H}$ ) $^+$  359.0647, found 359.0468.

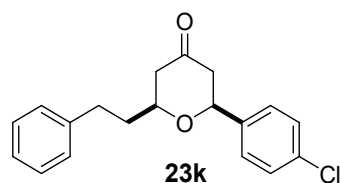

**2-(4-Chlorophenyl)-6-phenethyltetrahydropyran-4-one (23k).** Light yellow oil:  $R_f = 0.40$  (20% EtOAc/hexanes);  $^1\text{H NMR}$  (300 MHz,  $\text{CDCl}_3$ )  $\delta$  7.39–7.24 (m, 6H), 7.23–7.15 (m, 3H), 4.59 (dd,  $J = 11.7, 3.0$  Hz, 1H), 3.78–3.67 (m, 1H), 2.91–2.71 (m, 2H), 2.66–2.57 (m, 1H), 2.55–2.37 (m, 3H), 2.17–2.02 (m, 1H), 1.98–1.83 (m, 1H);  $^{13}\text{C NMR}$  (75 MHz,  $\text{CDCl}_3$ )  $\delta$  206.4, 141.3, 139.5, 133.8, 128.8, 128.6, 128.5, 127.0, 126.1, 77.8, 76.3, 49.4, 47.7, 37.9, 31.5; IR (thin film): 3026, 2927, 1717, 1490, 1088, 700  $\text{cm}^{-1}$ ; HRMS (ES/MeOH):  $m/z$  calcd for  $\text{C}_{19}\text{H}_{19}\text{ClNaO}_2$  ( $\text{M} + \text{Na}$ ) $^+$  337.0971, found 337.0925.

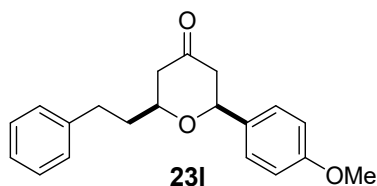

**2-(4-Methoxyphenyl)-6-phenethyltetrahydropyran-4-one (23l).** Light yellow oil:  $R_f = 0.32$  (20% EtOAc/hexanes);  $^1\text{H NMR}$  (300 MHz,  $\text{CDCl}_3$ )  $\delta$  7.36–7.24 (m, 4H), 7.23–7.15 (m, 3H), 6.93 (d,  $J = 8.7$  Hz, 2H), 4.57 (dd,  $J = 9.6, 4.5$  Hz, 1H), 3.82 (s, 3H), 3.77–3.67 (m, 1H), 2.91–2.70 (m, 2H), 2.67–2.53 (m, 2H), 2.50–2.33 (m, 2H), 2.16–2.00 (m, 1H), 1.96–1.82 (m, 1H);  $^{13}\text{C NMR}$  (75 MHz,  $\text{CDCl}_3$ )  $\delta$  206.9, 159.4, 141.5, 133.2, 128.5, 127.1, 126.1, 114.1, 78.3, 76.2, 55.4, 49.5, 47.8, 38.0, 31.6; IR (thin film): 3026, 2931, 1717, 1493, 1052, 697  $\text{cm}^{-1}$ ; HRMS (ES/MeOH):  $m/z$  calcd for  $\text{C}_{20}\text{H}_{22}\text{NaO}_3$  ( $\text{M} + \text{Na}$ ) $^+$  333.1467, found 333.1442.

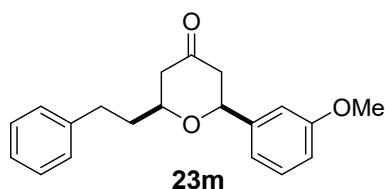

**2-(3-Methoxyphenyl)-6-phenethyltetrahydropyran-4-one (23m).** Light yellow oil:  $R_f = 0.34$  (20% EtOAc/hexanes);  $^1\text{H NMR}$  (300 MHz,  $\text{CDCl}_3$ )  $\delta$  7.35–7.23 (m, 3H), 7.23–7.14 (m, 3H), 7.00–6.92 (m, 2H), 6.90–6.82 (m, 1H), 4.60 (dd,  $J = 11.1, 3.0$  Hz, 1H), 3.83 (s, 3H), 3.78–3.67 (m, 1H), 2.93–2.71 (m, 2H), 2.69–2.37 (m, 4H), 2.18–2.01



(m, 1H), 1.97–1.81 (m, 1H);  $^{13}\text{C}$  NMR (75 MHz,  $\text{CDCl}_3$ )  $\delta$  206.7, 159.9, 142.6, 141.4, 129.7, 128.5, 126.0, 117.9, 113.2, 111.5, 78.3, 76.2, 55.3, 49.5, 47.7, 37.9, 31.5; IR (thin film): 2933, 2859, 1718, 1490, 1046, 698  $\text{cm}^{-1}$ ; HRMS (ES/MeOH):  $m/z$  calcd for  $\text{C}_{20}\text{H}_{22}\text{NaO}_3$  ( $\text{M} + \text{Na}$ ) $^+$  333.1467, found 333.1430.

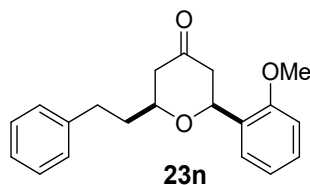

**2-(2-Methoxyphenyl)-6-phenethyltetrahydropyran-4-one (23n).** Light yellow oil:  $R_f = 0.37$  (20% EtOAc/hexanes);  $^1\text{H}$  NMR (300 MHz,  $\text{CDCl}_3$ )  $\delta$  7.58 (d,  $J = 7.5$  Hz, 1H), 7.32–7.22 (m, 3H), 7.22–7.13 (m, 3H), 7.03 (t,  $J = 7.5$  Hz, 1H), 6.87 (d,  $J = 8.1$  Hz, 1H), 4.96 (dd,  $J = 11.4, 2.1$  Hz, 1H), 3.81 (s, 3H), 3.80–3.70 (m, 1H), 2.91–2.69 (m, 3H), 2.48–2.28 (m, 3H), 2.16–2.01 (m, 1H), 1.96–1.82 (m, 1H);  $^{13}\text{C}$  NMR (75 MHz,  $\text{CDCl}_3$ )  $\delta$  207.5, 155.5, 141.6, 129.7, 128.7, 128.6, 128.5, 126.0, 120.9, 110.3, 76.1, 73.3, 55.3, 48.3, 47.8, 38.1, 31.5; IR (thin film): 3026, 2928, 1717, 1494, 1246, 754  $\text{cm}^{-1}$ ; HRMS (ES/MeOH):  $m/z$  calcd for  $\text{C}_{20}\text{H}_{22}\text{NaO}_3$  ( $\text{M} + \text{Na}$ ) $^+$  333.1467, found 333.1435.

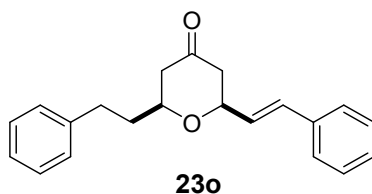

**2-Phenethyl-6-styryltetrahydropyran-4-one (23o).** Light yellow oil:  $R_f = 0.38$  (20% EtOAc/hexanes);  $^1\text{H}$  NMR (300 MHz,  $\text{CDCl}_3$ )  $\delta$  7.43–7.33 (m, 4H), 7.31–7.19 (m, 6H), 6.65 (d,  $J = 15.9$  Hz, 1H), 6.26 (d,  $J = 15.9, 5.7$  Hz, 1H), 4.26–4.20 (m, 1H), 3.69–3.61 (m, 1H), 2.90–2.71 (m, 2H), 2.54–2.28 (m, 4H), 2.12–2.00 (m, 1H), 1.91–1.79 (m, 1H);  $^{13}\text{C}$  NMR (75 MHz,  $\text{CDCl}_3$ )  $\delta$  206.5, 141.1, 136.4, 131.3, 128.7, 128.5, 128.4, 128.1, 126.7, 126.1, 77.3, 76.0, 47.9, 47.8, 37.9, 31.6; IR (thin film): 3026, 2927, 1718, 1495, 1054, 747  $\text{cm}^{-1}$ ; HRMS (ES/MeOH):  $m/z$  calcd for  $\text{C}_{21}\text{H}_{22}\text{NaO}_2$  ( $\text{M} + \text{Na}$ ) $^+$  329.1517, found 329.1511.

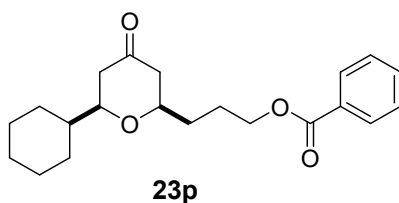

**2-(3-Benzoyloxy)propyl-6-cyclohexyltetrahydropyran-4-one (23p).** Colorless oil:  $R_f = 0.44$  (20% EtOAc/hexanes);  $^1\text{H NMR}$  (300 MHz,  $\text{CDCl}_3$ )  $\delta$  8.08–8.01 (m, 2H), 7.57 (app t,  $J = 7.2$  Hz, 1H), 7.45 (app t,  $J = 7.2$  Hz, 2H), 4.44–4.39 (m, 2H), 3.63–3.52 (m, 1H), 3.29 (ddd,  $J = 11.4, 6.6, 2.4$  Hz, 1H), 2.45–2.33 (m, 2H), 2.31–2.18 (m, 2H), 2.10–1.59 (m, 10H), 1.56–1.41 (m, 1H), 1.33–1.10 (m, 2H), 1.10–0.93 (m, 2H);  $^{13}\text{C NMR}$  (75 MHz,  $\text{CDCl}_3$ ) 208.1, 166.7, 133.0, 130.5, 129.7, 128.5, 81.4, 76.6, 64.8, 48.3, 45.4, 43.3, 33.1, 28.9, 28.6, 26.5, 26.1, 26.0, 25.1; IR (thin film): 2926, 2852, 1718, 1451, 1274, 1113  $\text{cm}^{-1}$ ; HRMS (ES/MeOH):  $m/z$  calcd for  $\text{C}_{21}\text{H}_{28}\text{NaO}_4$  ( $\text{M} + \text{Na}$ ) $^+$  367.1885, found 367.1877.

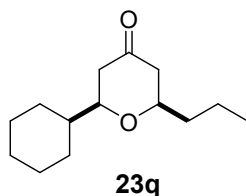

**2-Cyclohexyl-6-propyltetrahydropyran-4-one (23q).** Colorless oil:  $R_f = 0.53$  (20% EtOAc/hexanes);  $^1\text{H NMR}$  (300 MHz,  $\text{CDCl}_3$ )  $\delta$  3.52–3.48 (m, 1H), 3.26 (ddd,  $J = 6.9, 4.5, 1.5$  Hz, 1H), 2.36 (dd,  $J = 15.3, 8.4$  Hz, 2H), 2.21 (dd,  $J = 15.3, 2.7$  Hz, 2H), 2.01–1.98 (m, 1H), 1.76–1.63 (m, 5H), 1.53–1.38 (m, 5H), 1.25–1.14 (m, 2H), 1.04–0.98 (m, 2H), 0.93 (t,  $J = 4.5$  Hz, 3H);  $^{13}\text{C NMR}$  (75 MHz,  $\text{CDCl}_3$ )  $\delta$  208.7, 81.3, 76.8, 48.4, 45.6, 43.3, 38.6, 29.0, 28.5, 26.5, 26.1, 26.0, 18.8, 14.0; IR (thin film): 2927, 2853, 1720, 1450, 1158, 846  $\text{cm}^{-1}$ ; HRMS (ES/MeOH):  $m/z$  calcd for  $\text{C}_{14}\text{H}_{24}\text{NaO}_2$  ( $\text{M} + \text{Na}$ ) $^+$  247.1674, found 247.1677.

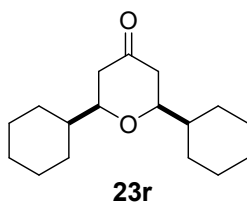

**2,6-Dicyclohexyltetrahydropyran-4-one (23r).** Light yellow solid:  $R_f = 0.55$  (20% EtOAc/hexanes); mp 69.5–70.6  $^\circ\text{C}$ ;  $^1\text{H NMR}$  (300 MHz,  $\text{CDCl}_3$ )  $\delta$  3.22 (ddd,  $J = 11.4,$

6.9, 2.1 Hz, 2H), 2.39 (dd,  $J = 14.4, 1.5$  Hz, 2H), 2.28–2.15 (m, 2H), 2.06–1.93 (m, 2H), 1.84–1.58 (m, 8H), 1.54–1.39 (m, 2H), 1.34–1.10 (m, 6H), 1.10–0.92 (m, 4H);  $^{13}\text{C}$  NMR (75 MHz,  $\text{CDCl}_3$ )  $\delta$  209.3, 81.3, 45.7, 43.4, 28.9, 28.6, 26.5, 26.1, 26.0; IR (thin film): 2925, 2852, 1719, 1450, 1271, 1066  $\text{cm}^{-1}$ ; HRMS (ES/MeOH):  $m/z$  calcd for  $\text{C}_{17}\text{H}_{28}\text{NaO}_2$  ( $\text{M} + \text{Na}$ ) $^+$  287.1987, found 287.1947.

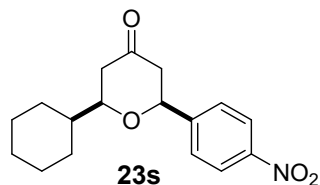

**2-Cyclohexyl-6-(4-nitrophenyl)tetrahydropyran-4-one (23s).** Light yellow solid:  $R_f = 0.36$  (20% EtOAc/hexanes); mp 118.2–119.8  $^{\circ}\text{C}$ ;  $^1\text{H}$  NMR (500 MHz,  $\text{CDCl}_3$ )  $\delta$  8.24 (d,  $J = 5.1$  Hz, 2H), 7.55 (d,  $J = 5.1$  Hz, 2H), 4.72,  $J = 6.9, 1.2$  Hz, 1H), 3.58–3.54 (m, 1H), 2.69–2.67 (m, 1H), 2.52–2.40 (m, 3H), 1.99–1.97 (m, 1H), 1.80–1.62 (m, 5H), 1.33–1.06 (m, 5H);  $^{13}\text{C}$  NMR (125 MHz,  $\text{CDCl}_3$ )  $\delta$  206.3, 148.4, 147.5, 126.3, 123.9, 81.6, 77.4, 49.5, 45.0, 43.2, 28.7, 28.5, 26.5, 26.1, 26.0; IR (thin film): 2927, 2853, 1721, 1520, 1346, 853  $\text{cm}^{-1}$ ; HRMS (ES/MeOH):  $m/z$  calcd for  $\text{C}_{17}\text{H}_{22}\text{NO}_4$  ( $\text{M} + \text{H}$ ) $^+$  304.1549, found 304.1450.

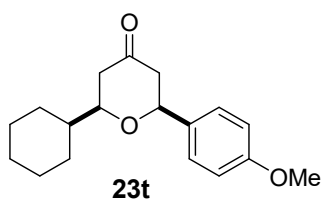

**2-Cyclohexyl-6-(4-methoxyphenyl)tetrahydropyran-4-one (23t).** Colorless oil:  $R_f = 0.47$  (20% EtOAc/hexanes);  $^1\text{H}$  NMR (300 MHz,  $\text{CDCl}_3$ )  $\delta$  7.29 (d,  $J = 5.1$  Hz, 2H), 6.90 (d,  $J = 5.1$  Hz, 2H), 4.55,  $J = 6.9, 1.5$  Hz, 1H), 3.80 (s, 3H), 3.52–3.48 (m, 1H), 2.62–2.50 (m, 2H), 2.46–2.35 (m, 2H), 1.97–1.95 (m, 1H), 1.77–1.56 (m, 5H), 1.27–1.04 (m, 5H);  $^{13}\text{C}$  NMR (75 MHz,  $\text{CDCl}_3$ )  $\delta$  208.0, 159.3, 133.4, 126.9, 114.0, 81.5, 78.2, 55.4, 49.8, 45.1, 43.2, 28.8, 28.4, 26.5, 26.1; IR (thin film): 2926, 2852, 1719, 1514, 1249, 827  $\text{cm}^{-1}$ ; HRMS (ES/MeOH):  $m/z$  calcd for  $\text{C}_{18}\text{H}_{25}\text{O}_3$  ( $\text{M} + \text{H}$ ) $^+$  289.1804, found 289.1800.

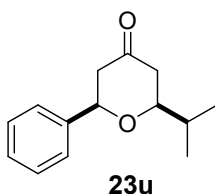

**2-Isopropyl-6-phenyltetrahydropyran-4-one (23u).** Light yellow oil:  $R_f = 0.53$  (20% EtOAc/hexanes);  $^1\text{H NMR}$  (300 MHz,  $\text{CDCl}_3$ )  $\delta$  7.40–7.27 (m, 5H), 4.63 (dd,  $J = 11.4, 2.7$  Hz, 1H), 3.52 (ddd,  $J = 10.8, 5.7, 3.0$  Hz, 1H), 2.69–2.60 (m, 1H), 2.58–2.33 (m, 3H), 2.00–1.87 (m, 1H), 1.04 (d,  $J = 6.9$  Hz, 3H), 1.00 (d,  $J = 6.9$  Hz, 3H);  $^{13}\text{C NMR}$  (75 MHz,  $\text{CDCl}_3$ )  $\delta$  207.6, 141.4, 128.6, 127.9, 125.6, 82.1, 78.5, 49.9, 44.8, 33.4, 18.3, 18.1; IR (thin film): 3032, 2963, 1717, 1252, 1066, 753  $\text{cm}^{-1}$ ; HRMS (ES/MeOH):  $m/z$  calcd for  $\text{C}_{14}\text{H}_{18}\text{NaO}_2$  ( $\text{M} + \text{Na}$ ) $^+$  241.1204, found 241.1202.

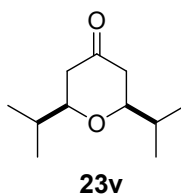

**2,6-Diisopropyltetrahydropyran-4-one (23v).** Light yellow oil:  $R_f = 0.62$  (20% EtOAc/hexanes);  $^1\text{H NMR}$  (300 MHz,  $\text{CDCl}_3$ )  $\delta$  3.22 (ddd,  $J = 11.4, 6.6, 2.1$  Hz, 2H), 2.38 (dd,  $J = 14.1, 1.5$  Hz, 2H), 2.25–2.16 (m, 2H), 1.83–1.72 (m, 2H), 0.99 (d,  $J = 6.6$  Hz, 6H), 0.91 (d,  $J = 6.6$  Hz, 6H);  $^{13}\text{C NMR}$  (75 MHz,  $\text{CDCl}_3$ )  $\delta$  209.1, 81.9, 45.4, 33.6, 18.4, 18.3; IR (thin film): 2963, 1723, 1470, 1256, 1068, 887  $\text{cm}^{-1}$ ; HRMS (ES/MeOH):  $m/z$  calcd for  $\text{C}_{11}\text{H}_{20}\text{NaO}_2$  ( $\text{M} + \text{Na}$ ) $^+$  207.1361, found 207.1359.

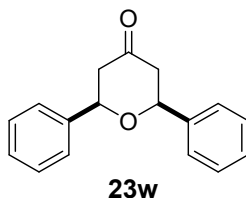

**2,6-Diphenyltetrahydropyran-4-one (23w).** Light yellow oil:  $R_f = 0.45$  (20% EtOAc/hexanes);  $^1\text{H NMR}$  (300 MHz,  $\text{CDCl}_3$ )  $\delta$  7.50–7.30 (m, 10H), 4.84 (dd,  $J = 10.2, 4.2$  Hz, 2H), 2.80–2.68 (m, 4H);  $^{13}\text{C NMR}$  (75 MHz,  $\text{CDCl}_3$ )  $\delta$  206.2, 140.8, 128.7, 128.2, 125.7, 79.0, 49.8; IR (thin film): 3032, 1720, 1452, 1245, 1054, 698  $\text{cm}^{-1}$ ; HRMS (ES/MeOH):  $m/z$  calcd for  $\text{C}_{17}\text{H}_{16}\text{NaO}_2$  ( $\text{M} + \text{Na}$ ) $^+$  275.1048, found 275.1007.

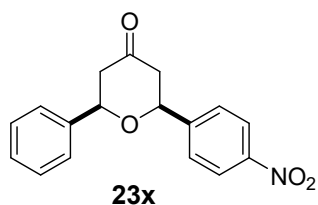

**2-(4-Nitrophenyl)-6-phenyltetrahydropyran-4-one (23x).** Light yellow oil:  $R_f = 0.30$  (20% EtOAc/hexanes);  $^1\text{H NMR}$  (300 MHz,  $\text{CDCl}_3$ )  $\delta$  8.26 (d,  $J = 8.7$  Hz, 2H), 7.64 (d,  $J = 8.7$  Hz, 2H), 7.50–7.30 (m, 5H), 4.97 (dd,  $J = 11.7, 2.7$  Hz, 1H), 4.88 (dd,  $J = 10.2, 4.2$  Hz, 1H), 2.85–2.60 (m, 4H);  $^{13}\text{C NMR}$  (75 MHz,  $\text{CDCl}_3$ )  $\delta$  204.6, 147.8, 140.3, 128.9, 128.5, 126.5, 125.7, 124.0, 79.3, 77.9, 49.5, 49.3; IR (thin film): 3026, 2968, 1720, 1519, 1347, 697  $\text{cm}^{-1}$ ; HRMS (ES/MeOH):  $m/z$  calcd for  $\text{C}_{17}\text{H}_{15}\text{NNaO}_4$  ( $\text{M} + \text{Na}$ ) $^+$  320.0899, found 320.0895.

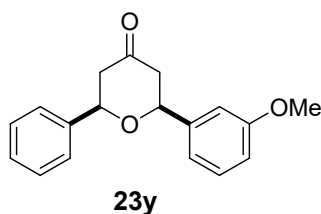

**2-(3-Methoxyphenyl)-6-phenyltetrahydropyran-4-one (23y).** Light yellow oil:  $R_f = 0.38$  (20% EtOAc/hexanes);  $^1\text{H NMR}$  (300 MHz,  $\text{CDCl}_3$ )  $\delta$  7.47–7.36 (m, 4H), 7.34–7.25 (m, 2H), 7.03–7.01 (m, 2H), 6.86 (dd,  $J = 8.1, 2.4$  Hz, 1H), 4.86–4.79 (m, 2H), 3.82 (s, 3H), 2.76–2.64 (m, 4H);  $^{13}\text{C NMR}$  (75 MHz,  $\text{CDCl}_3$ )  $\delta$  206.1, 160.0, 142.5, 140.8, 129.8, 128.7, 128.2, 125.8, 118.0, 113.3, 111.7, 79.1, 79.0, 55.4, 49.8; IR (thin film): 2962, 2836, 1717, 1267, 1041, 697  $\text{cm}^{-1}$ ; HRMS (ES/MeOH):  $m/z$  calcd for  $\text{C}_{18}\text{H}_{18}\text{NaO}_3$  ( $\text{M} + \text{Na}$ ) $^+$  305.1154, found 305.1150.

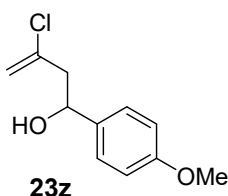

**3-Chloro-1-(3-methoxyphenyl)but-3-en-1-ol (23z).** Colorless oil:  $R_f = 0.35$  (20% EtOAc/hexanes);  $^1\text{H NMR}$  (300 MHz,  $\text{CDCl}_3$ ) 7.28–7.24 (m, 1H), 6.96–6.94 (m, 2H), 6.85–6.81 (m, 1H), 5.29 (d,  $J = 1.2$  Hz, 1H), 5.24 (d,  $J = 1.2$  Hz, 1H), 5.01 (dd,  $J = 8.7, 4.5$  Hz, 1H), 3.81 (s, 3H), 2.76 (dd,  $J = 14.4, 8.7$  Hz, 1H), 2.65 (dd,  $J = 14.4, 4.5$  Hz,

1H);  $^{13}\text{C}$  NMR (75 MHz,  $\text{CDCl}_3$ )  $\delta$  159.8, 144.8, 138.9, 129.7, 118.1, 115.5, 113.4, 111.3, 71.1, 55.3, 49.2; IR (thin film): 3411, 2942, 1600, 1263, 1042, 882  $\text{cm}^{-1}$ ; HRMS (ES/MeOH):  $m/z$  calcd for  $\text{C}_{11}\text{H}_{13}\text{ClNaO}_2$  ( $\text{M} + \text{Na}$ ) $^+$  235.0502, found 235.0500.

### 3. $^1\text{H}$ and $^{13}\text{C}$ NMR Spectra

**Figure SI1.**  $^1\text{H}$  NMR (300 MHz,  $\text{CDCl}_3$ ) spectrum of 5-chloro-1-phenylhex-5-en-3-ol (**21a**).

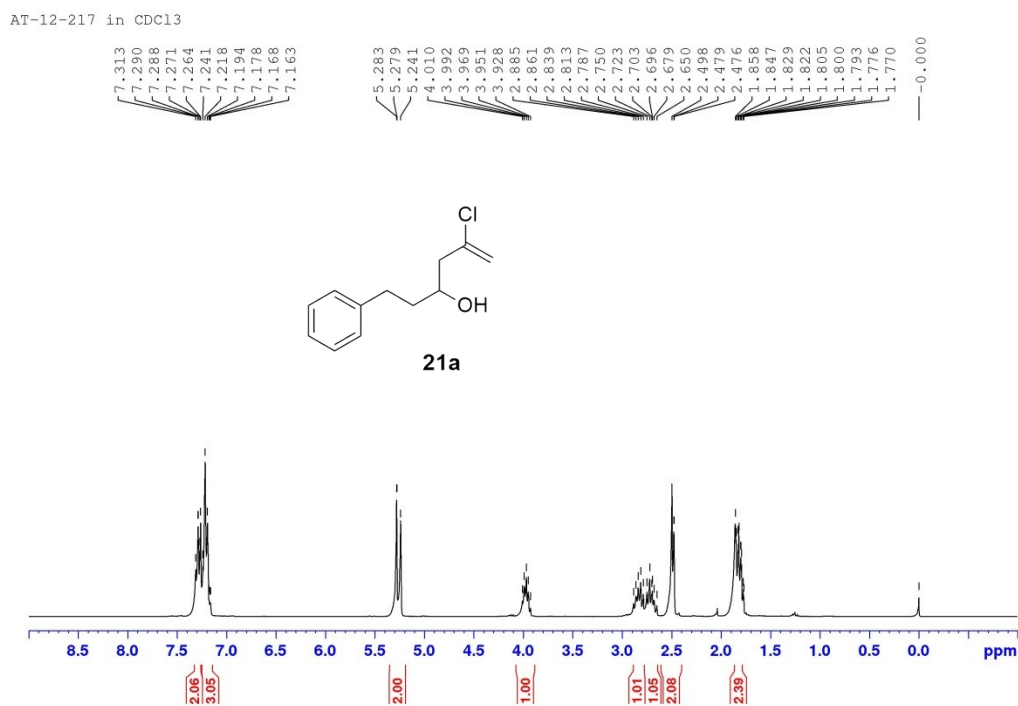

**Figure SI2.**  $^{13}\text{C}$  NMR (75 MHz,  $\text{CDCl}_3$ ) spectrum of 5-chloro-1-phenylhex-5-en-3-ol (**21a**).

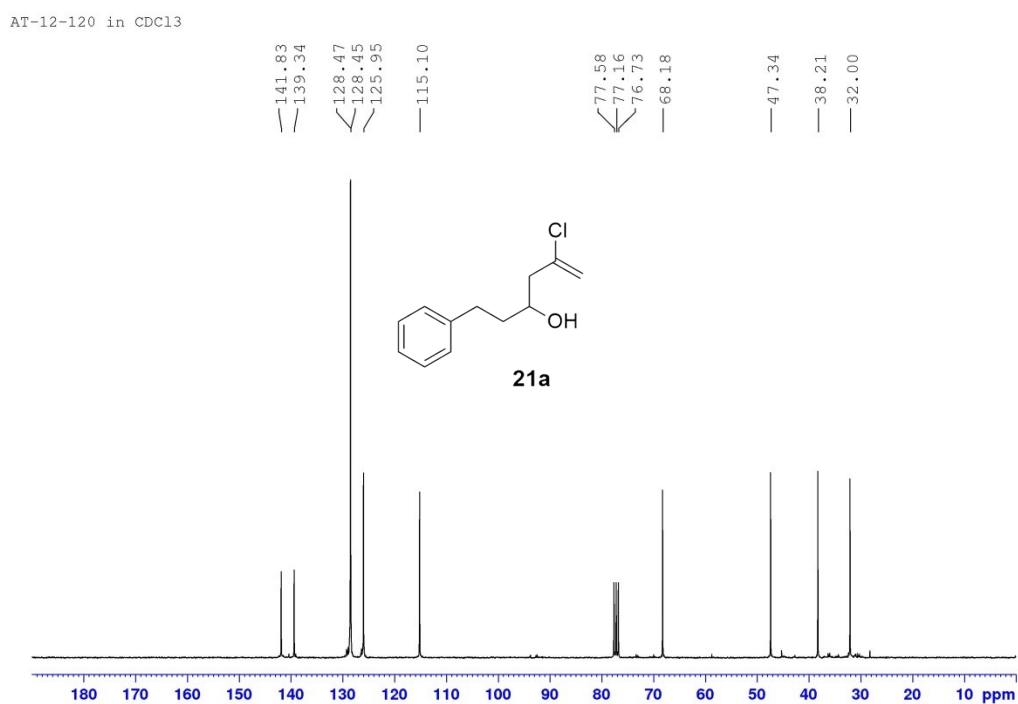

**Figure SI3.**  $^1\text{H}$  NMR (300 MHz,  $\text{CDCl}_3$ ) spectrum of 3-chloro-1-cyclohexyl-3-en-1-ol (**21b**).

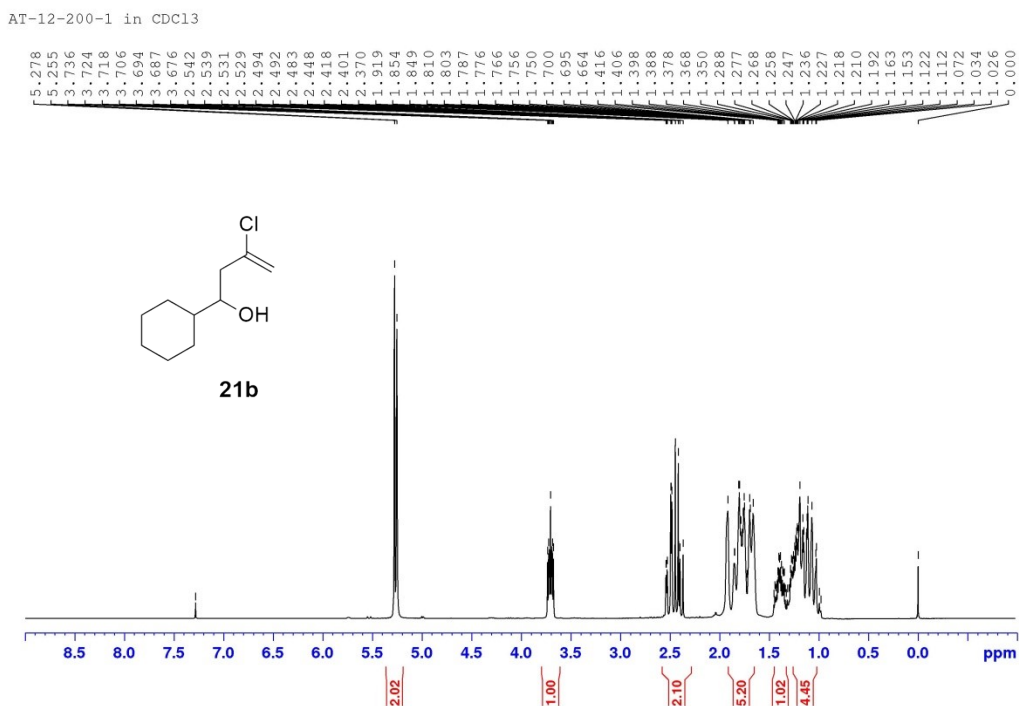

**Figure SI4.**  $^{13}\text{C}$  NMR (75 MHz,  $\text{CDCl}_3$ ) spectrum of 3-chloro-1-cyclohexyl-3-en-1-ol (**21b**).

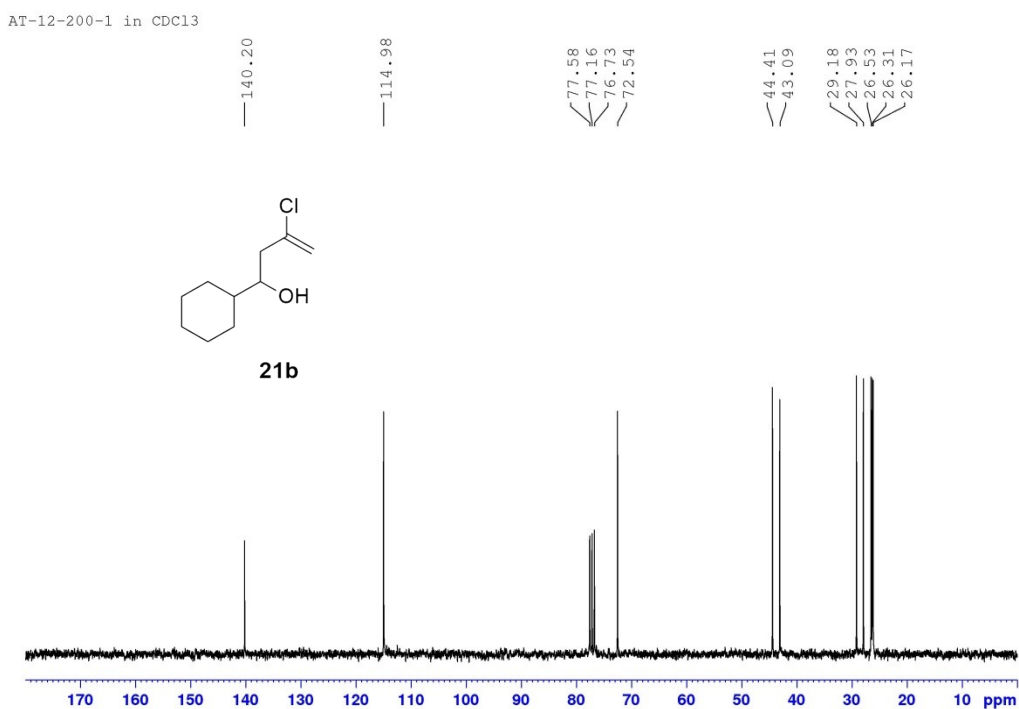

**Figure SI5.**  $^1\text{H}$  NMR (300 MHz,  $\text{CDCl}_3$ ) spectrum of 3-chloro-1-phenyl-3-en-1-ol (**21c**).



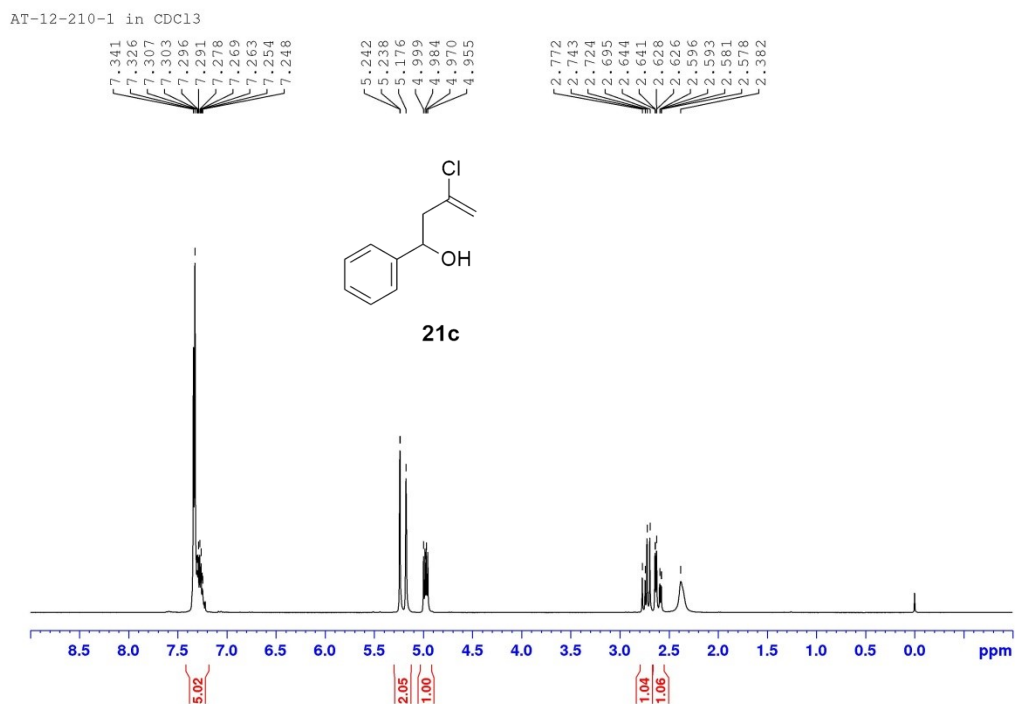

**Figure SI6.** <sup>1</sup>H NMR (75 MHz, CDCl<sub>3</sub>) spectrum of 3-chloro-1-phenyl-3-en-1-ol (**21c**).

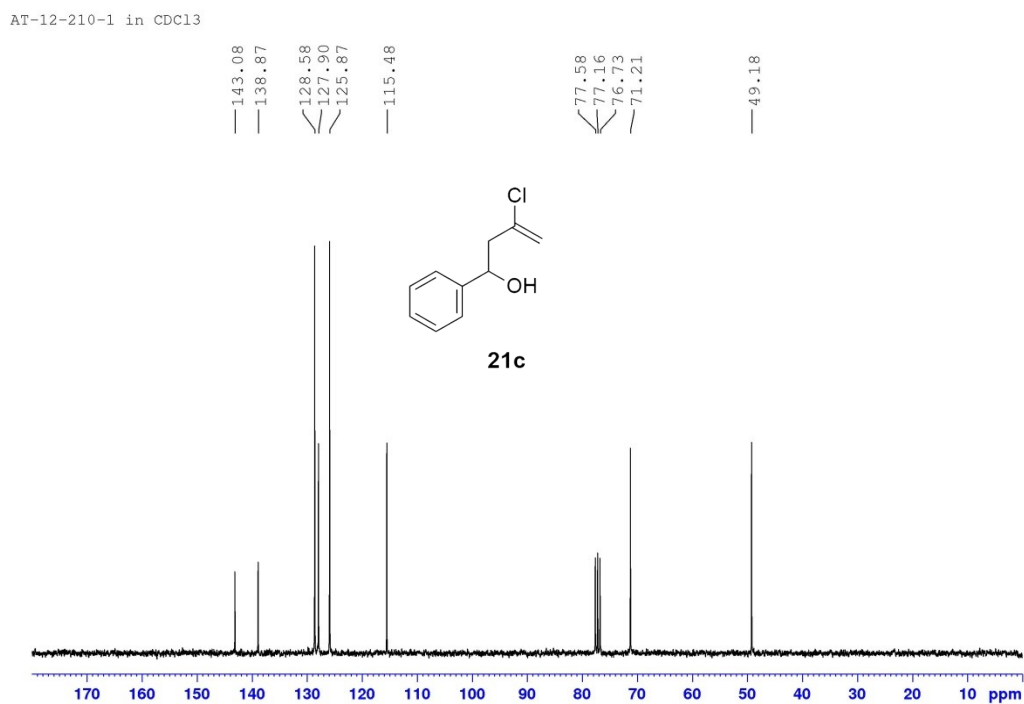

**Figure SI7.** <sup>13</sup>C NMR (300 MHz, CDCl<sub>3</sub>) spectrum of 2,6-diphenethyltetrahydropyran-4-one (**23a**)

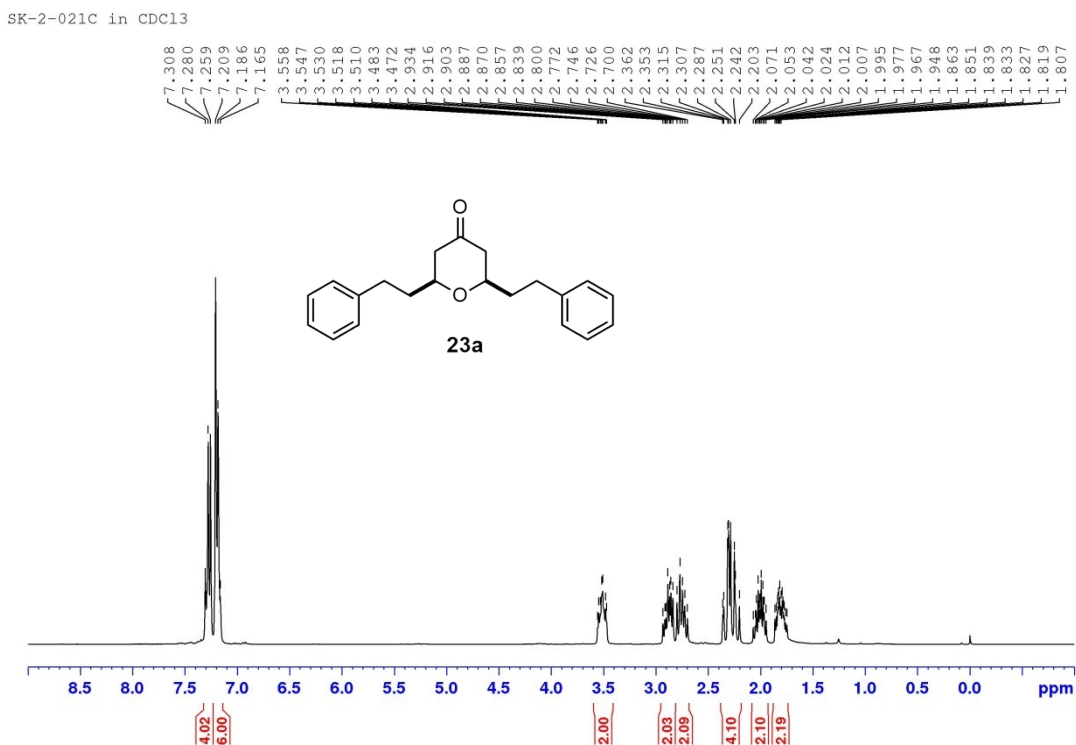

**Figure SI8.** <sup>13</sup>C NMR (75 MHz, CDCl<sub>3</sub>) spectrum of 2,6-diphenethyltetrahydropyran-4-one (**23a**)

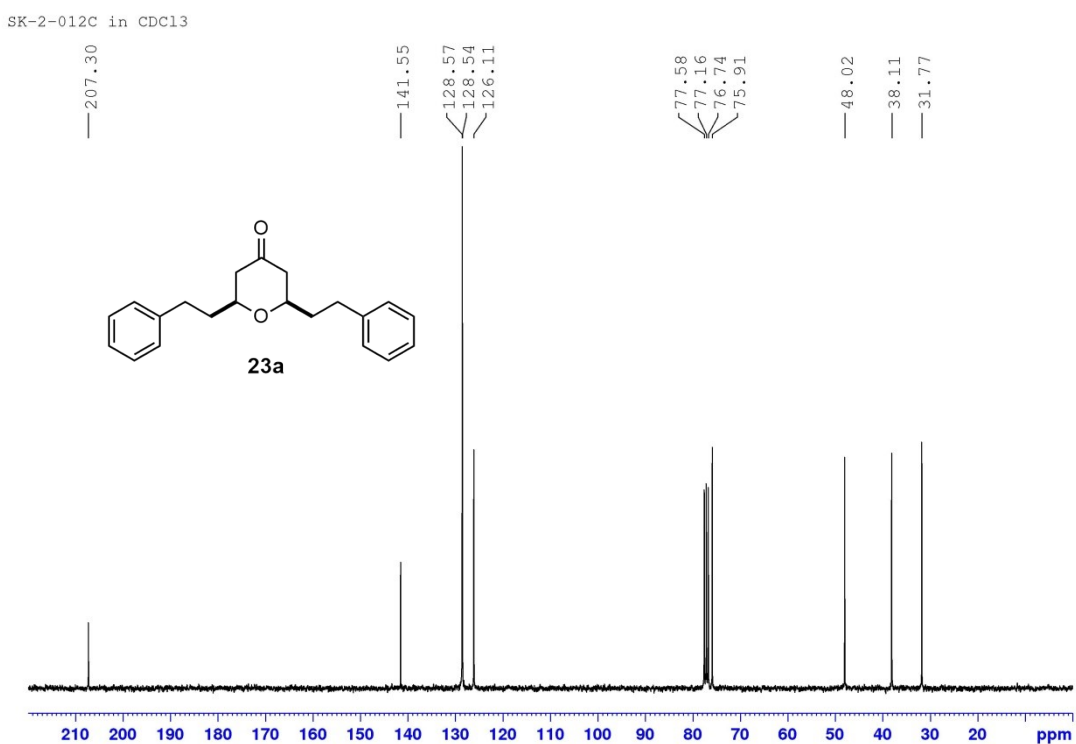

**Figure SI9.** <sup>13</sup>C NMR (300 MHz, CDCl<sub>3</sub>) spectrum of 4,4-dichloro-2,6-diphenethyltetrahydropyran (**24**)

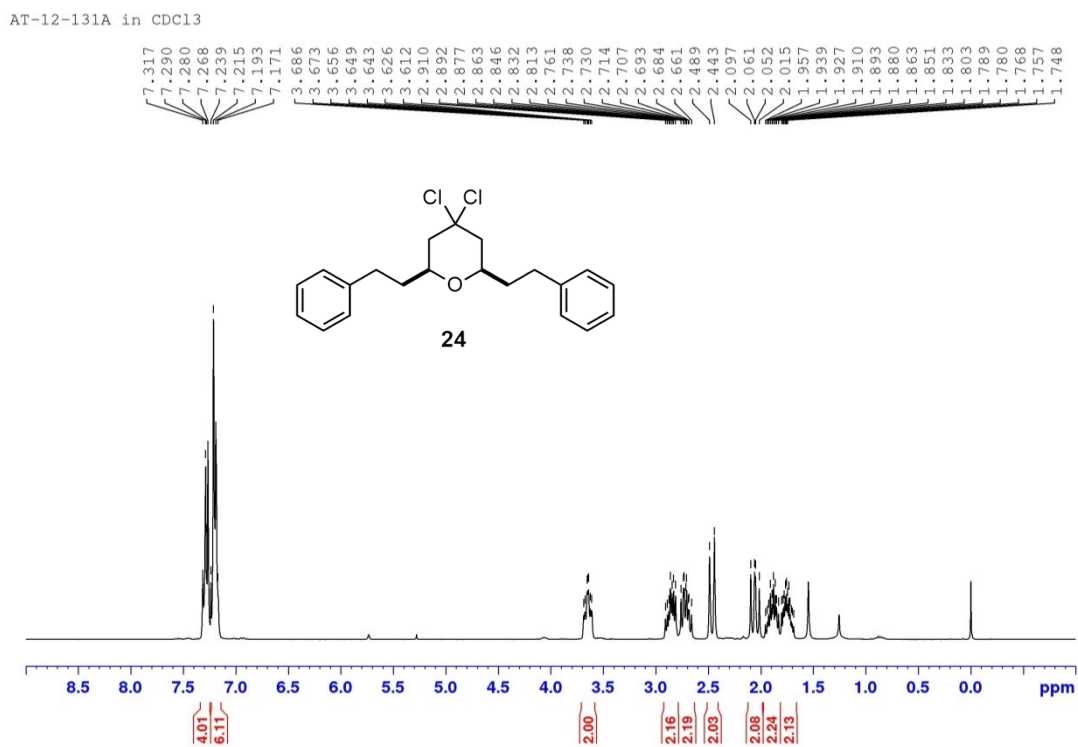

**Figure SI10.** <sup>13</sup>C NMR (75 MHz, CDCl<sub>3</sub>) spectrum of 4,4-dichloro-2,6-diphenethyltetrahydropyran (**24**)

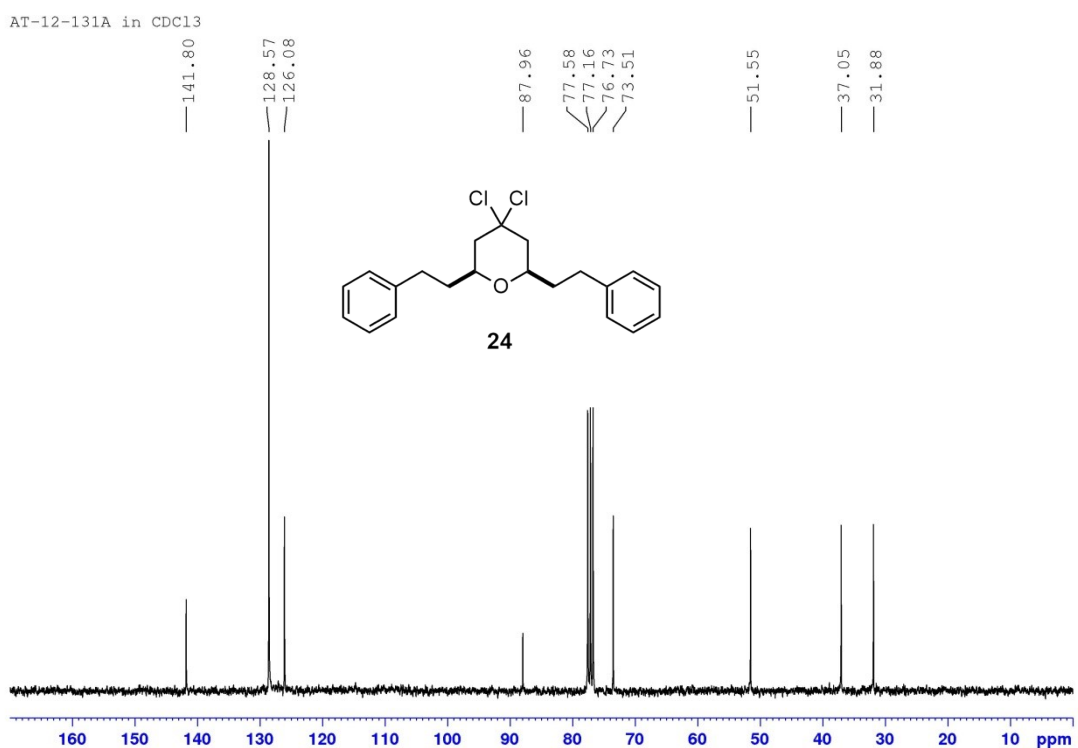

**Figure SI11.** <sup>13</sup>C NMR (300 MHz, CDCl<sub>3</sub>) spectrum of 2-phenethyl-6-propyltetrahydropyran-4-one (**23b**)

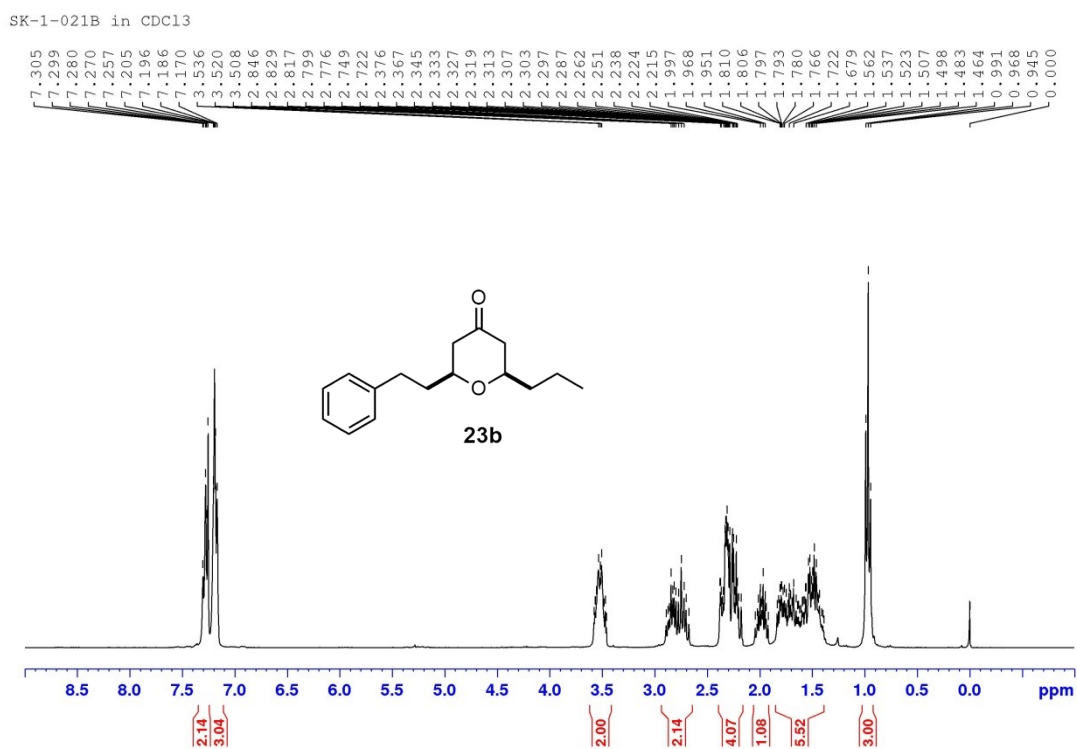

**Figure SI12.** <sup>13</sup>C NMR (75 MHz, CDCl<sub>3</sub>) spectrum of 2-phenethyl-6-propyltetrahydropyran-4-one (**23b**)

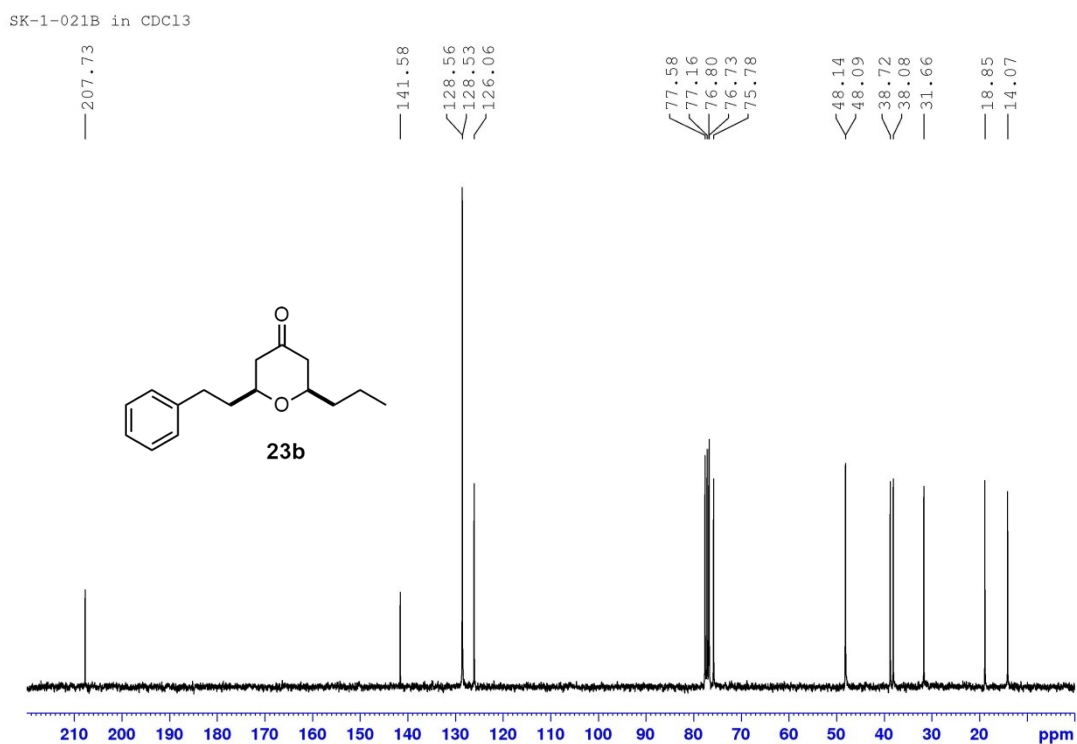

**Figure SI13.** <sup>13</sup>C NMR (300 MHz, CDCl<sub>3</sub>) spectrum of 2-pentyl-6-phenethyltetrahydropyran-4-one (**23c**)

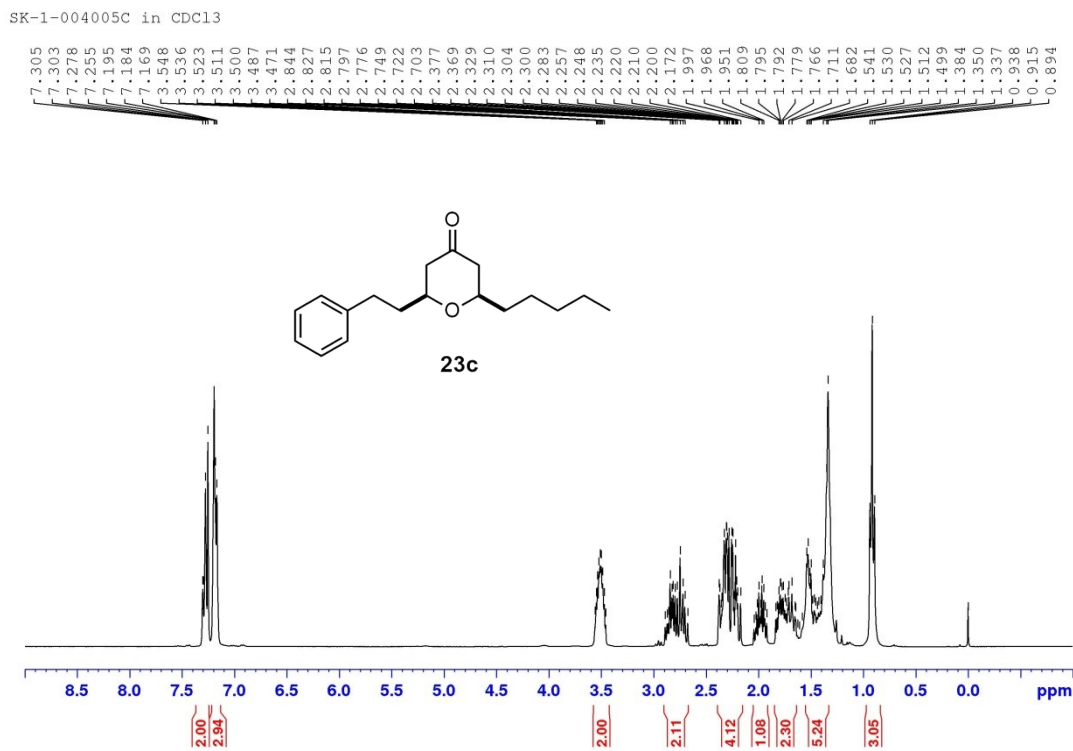

**Figure SI14.** <sup>13</sup>C NMR (75 MHz, CDCl<sub>3</sub>) spectrum of 2-pentyl-6-phenyltetrahydropyran-4-one (**23c**)

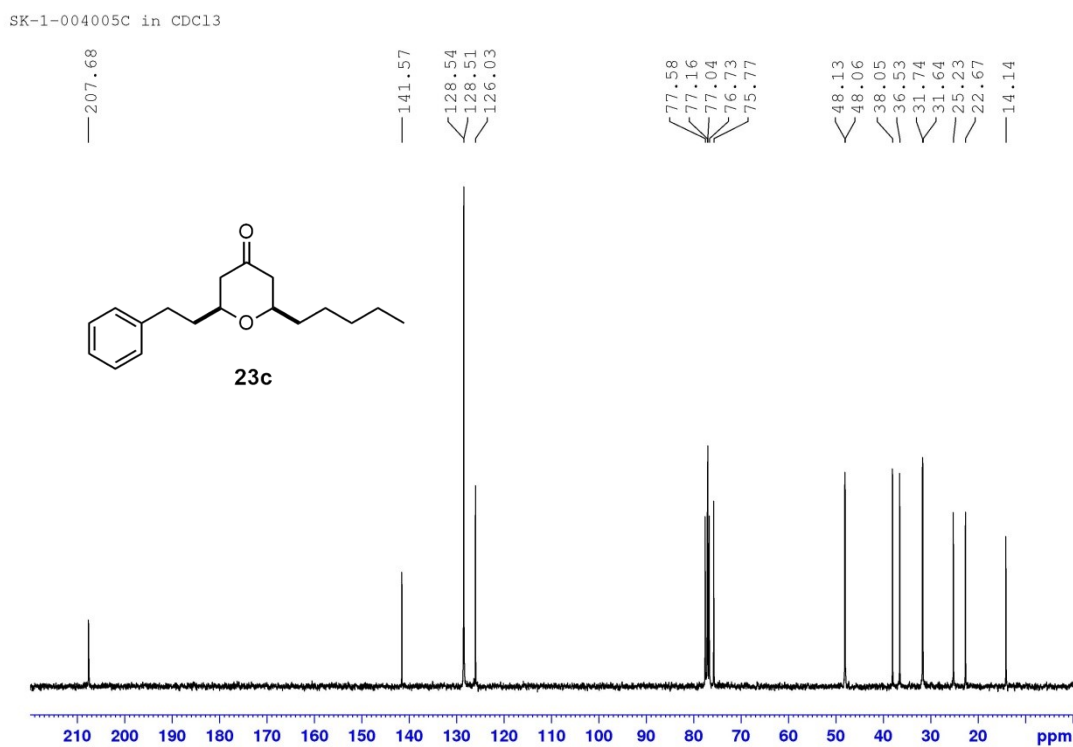

**Figure SI15.** <sup>1</sup>H NMR (300 MHz, CDCl<sub>3</sub>) spectrum of 2-isobutyl-6-phenyltetrahydropyran-4-one (**23d**)

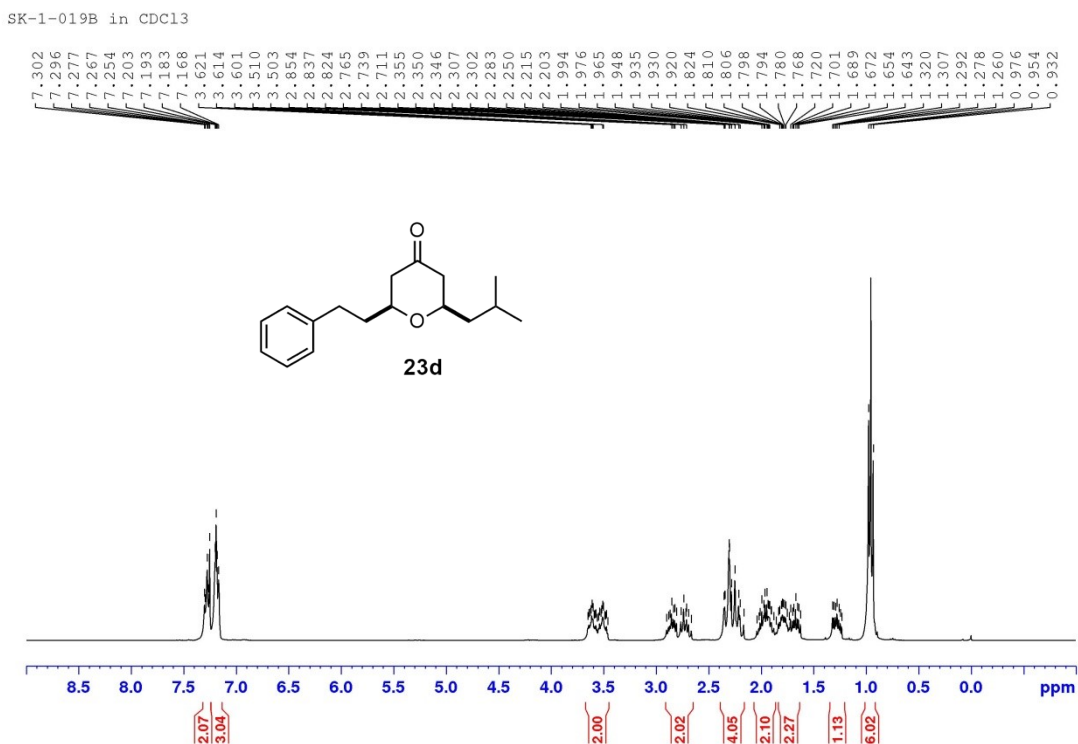

**Figure SI16.** <sup>13</sup>C NMR (75 MHz, CDCl<sub>3</sub>) spectrum of 2-isobutyl-6-phenethyltetrahydropyran-4-one (**23d**)

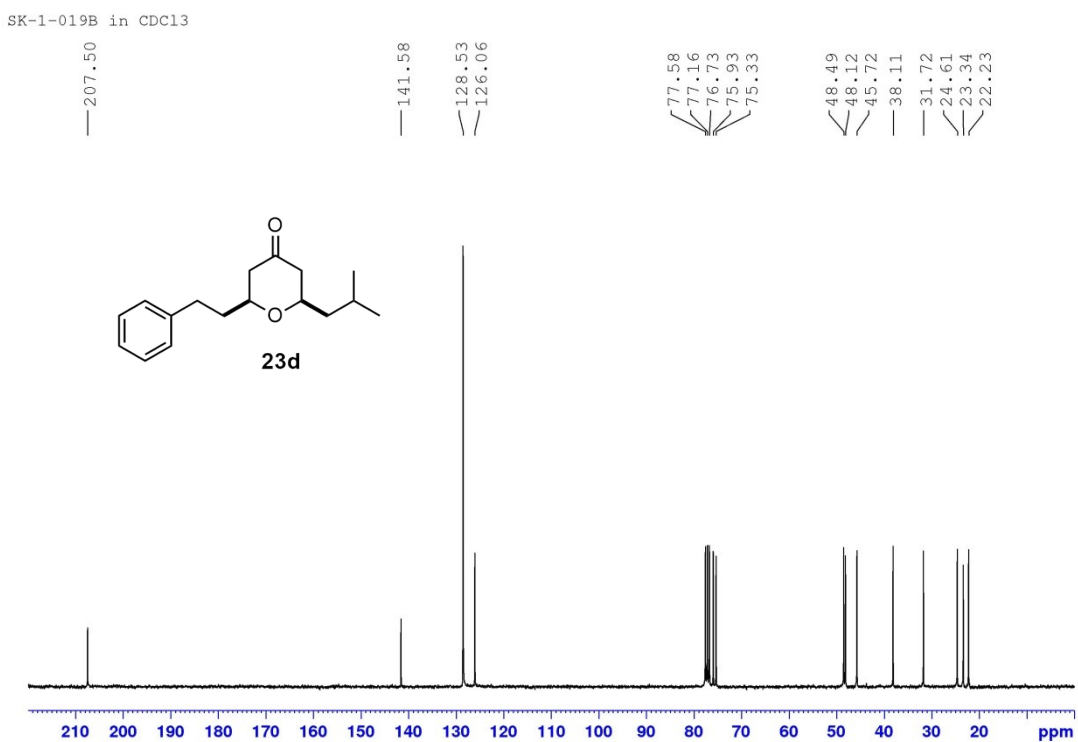

**Figure SI17.** <sup>1</sup>H NMR (300 MHz, CDCl<sub>3</sub>) spectrum of 2-isopropyl-6-phenethyltetrahydropyran-4-one (**23e**)

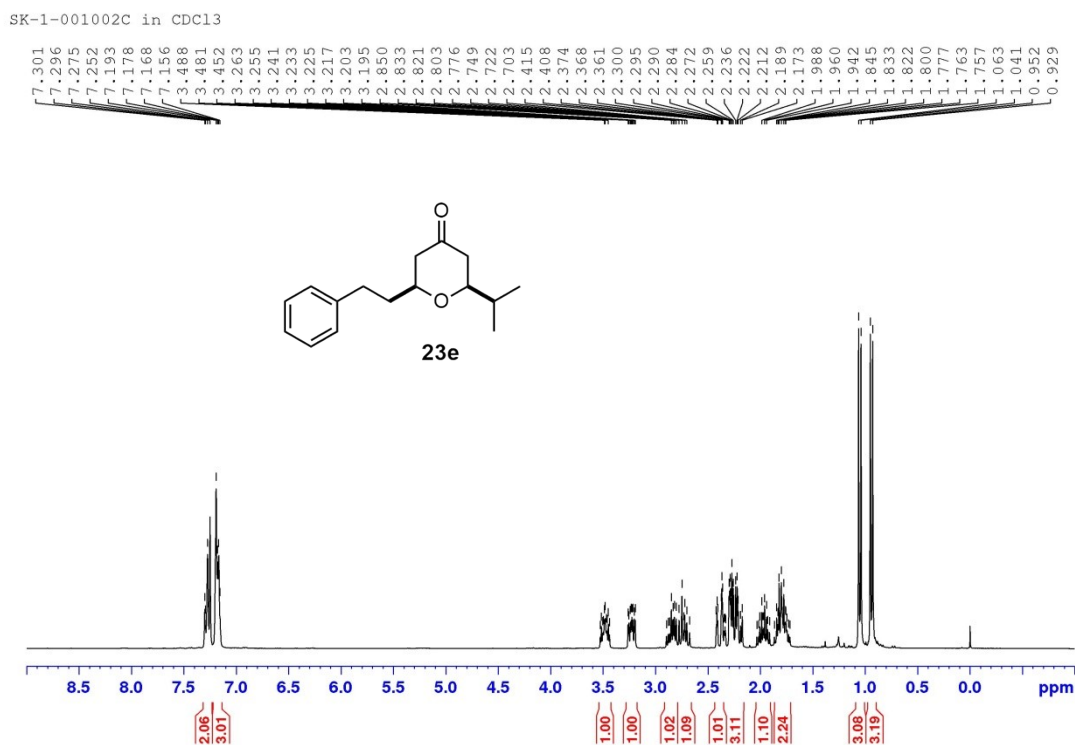

**Figure SI18.** <sup>13</sup>C NMR (75 MHz, CDCl<sub>3</sub>) spectrum of 2-isopropyl-6-phenethyltetrahydropyran-4-one (**23e**)

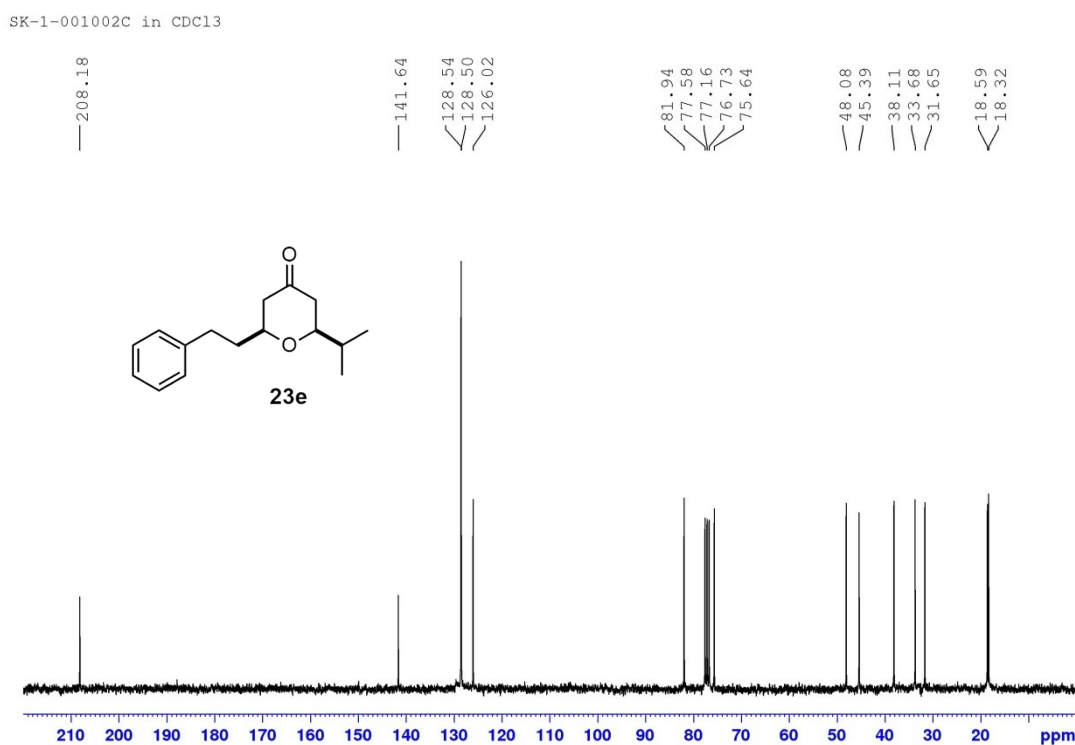

**Figure SI19.** <sup>1</sup>H NMR (300 MHz, CDCl<sub>3</sub>) spectrum of 2-cyclohexyl-6-phenethyltetrahydropyran-4-one (**23f**)

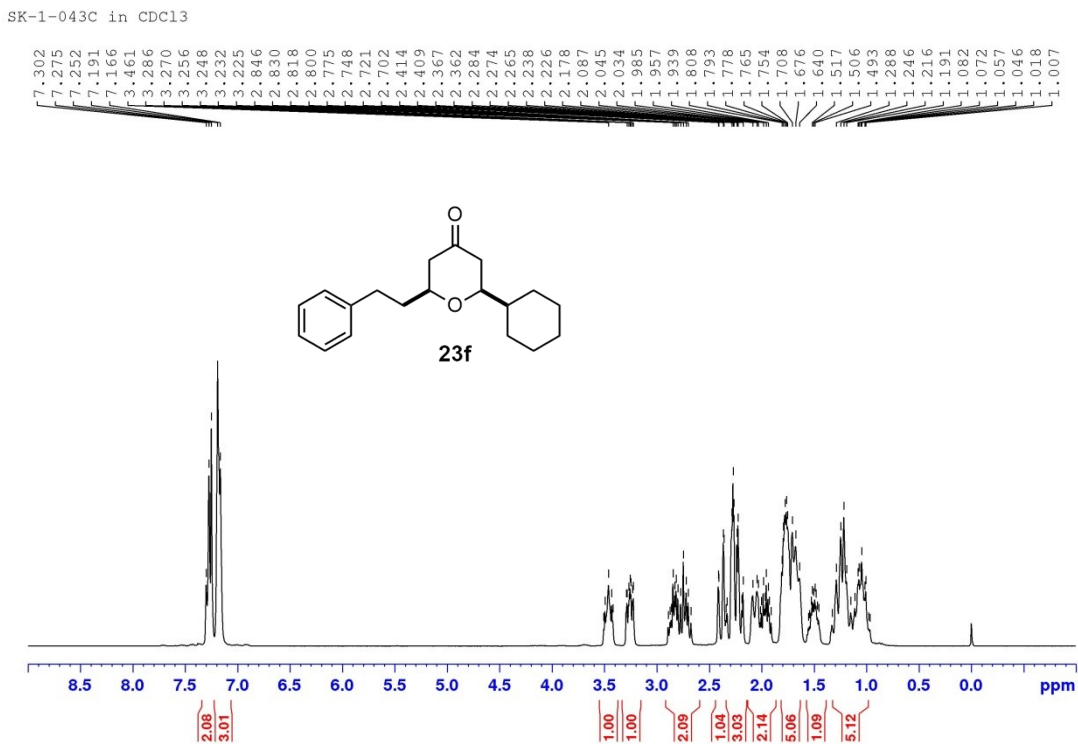

**Figure SI20.** <sup>13</sup>C NMR (75 MHz, CDCl<sub>3</sub>) spectrum of 2-cyclohexyl-6-phenethyltetrahydropyran-4-one (**23f**)

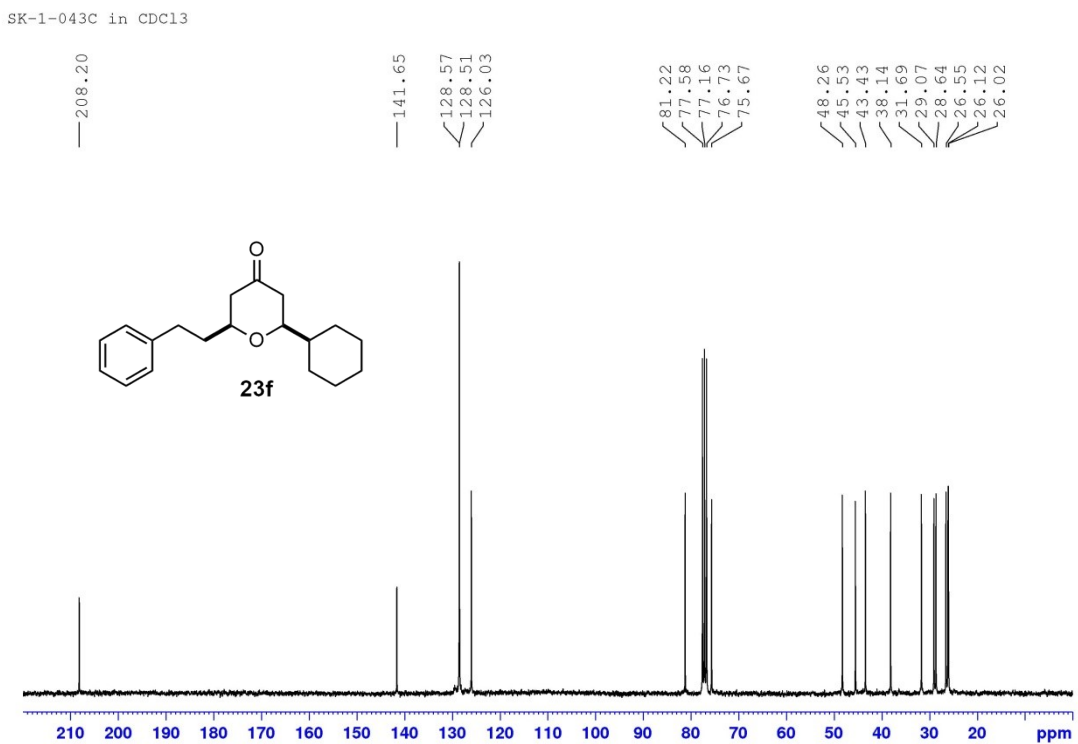

**Figure SI21.** <sup>1</sup>H NMR (300 MHz, CDCl<sub>3</sub>) spectrum of 2-phenethyl-6-phenyltetrahydropyran-4-one (**23g**)



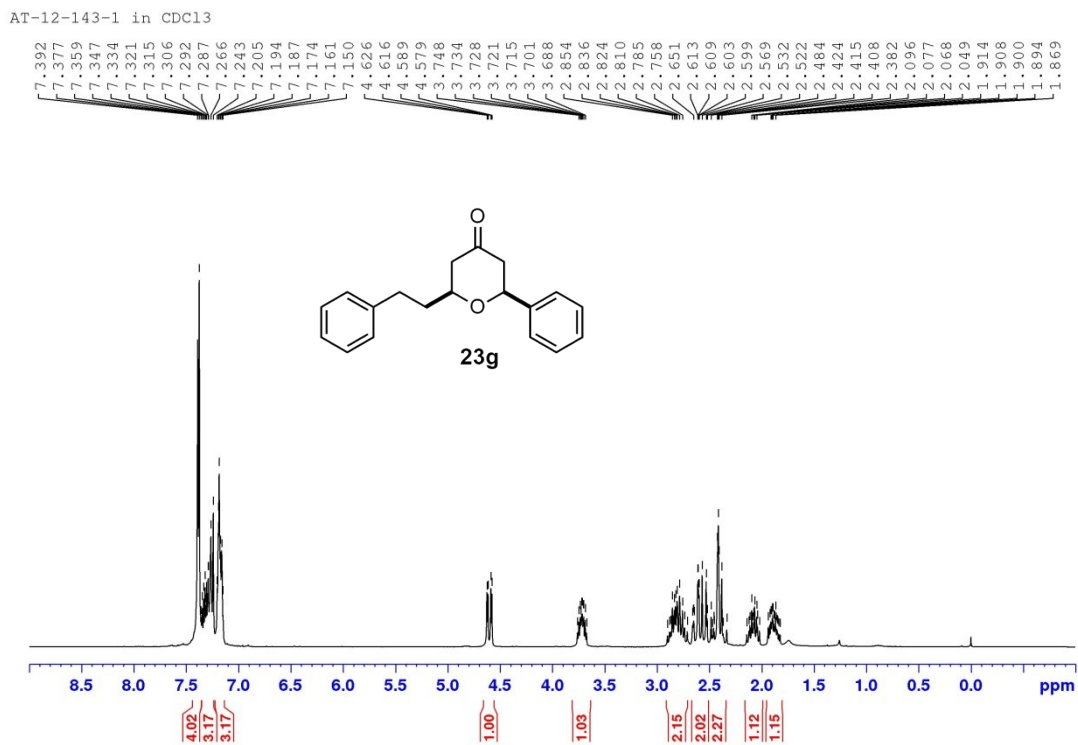

**Figure SI22.** <sup>13</sup>C NMR (75 MHz, CDCl<sub>3</sub>) spectrum of 2-phenethyl-6-phenyltetrahydropyran-4-one (**23g**)

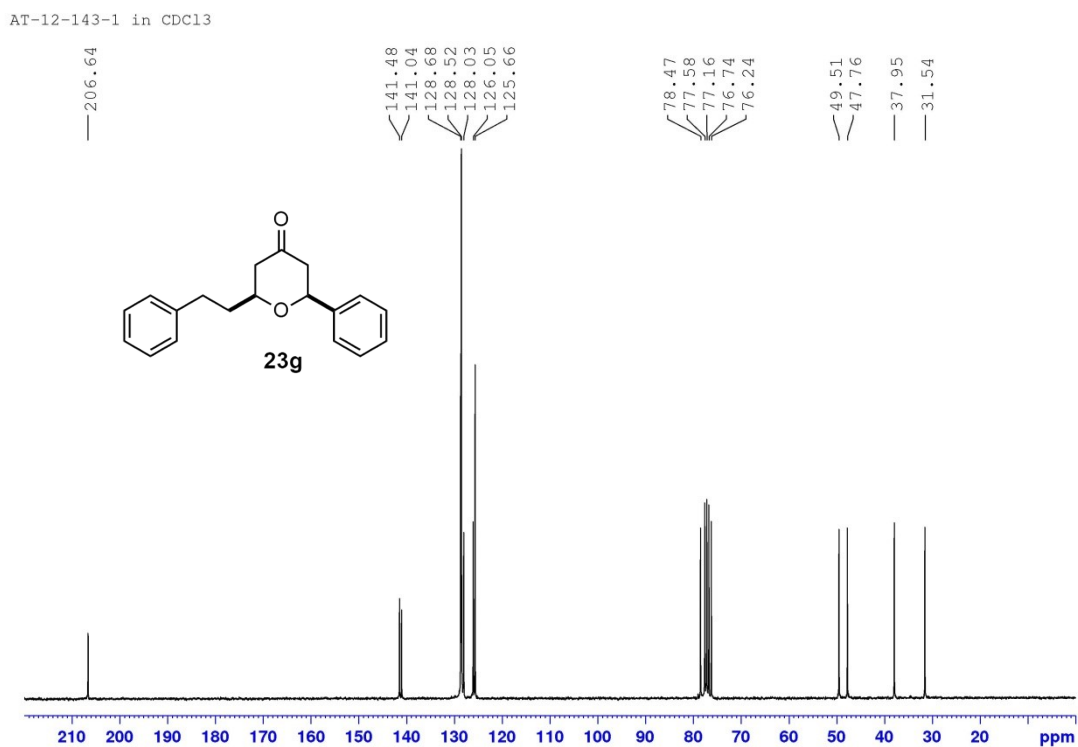

**Figure SI23.** <sup>13</sup>C NMR (300 MHz, CDCl<sub>3</sub>) spectrum of 2-(4-nitrophenyl)-6-phenethyl-tetrahydropyran-4-one (**23h**)



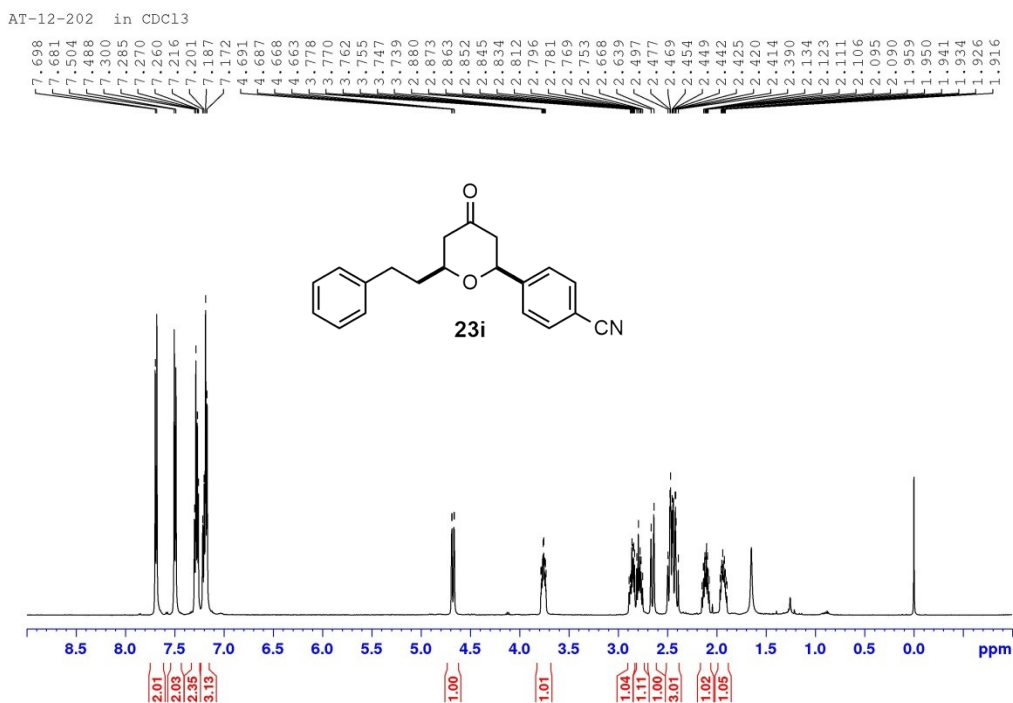

**Figure SI26.** <sup>13</sup>C NMR (75 MHz, CDCl<sub>3</sub>) spectrum of 2-(4-Cyanophenyl)-6-phenethyl-tetrahydropyran-4-one (**23i**)

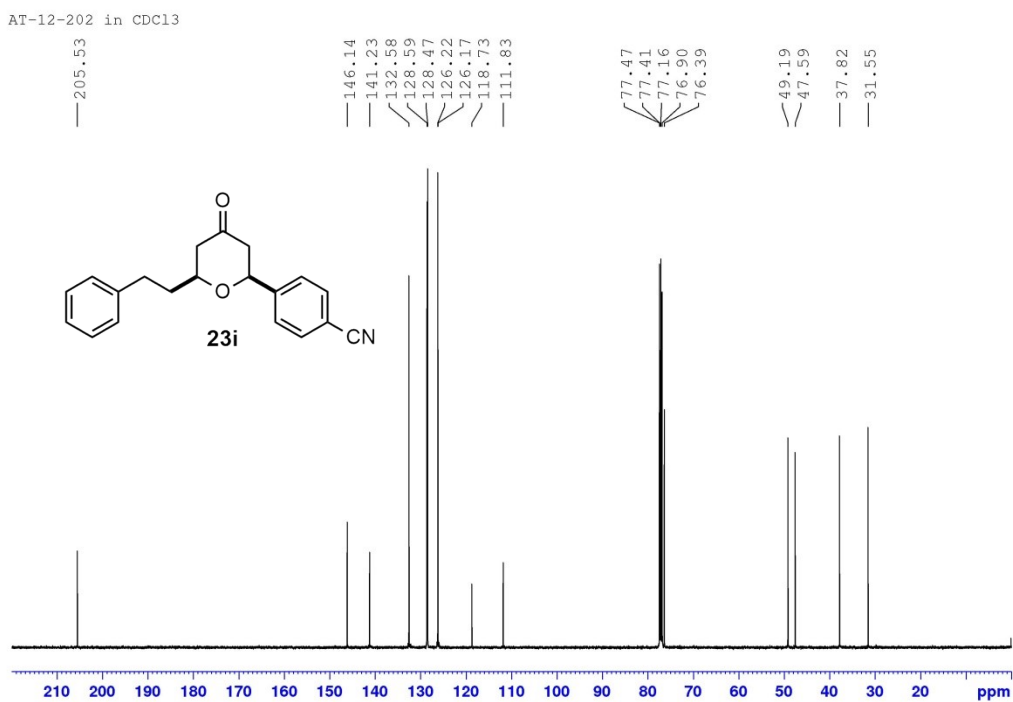

**Figure SI27.** <sup>1</sup>H NMR (300 MHz, CDCl<sub>3</sub>) spectrum of 2-(4-bromophenyl)-6-phenethyl-tetrahydropyran-4-one (**23j**)

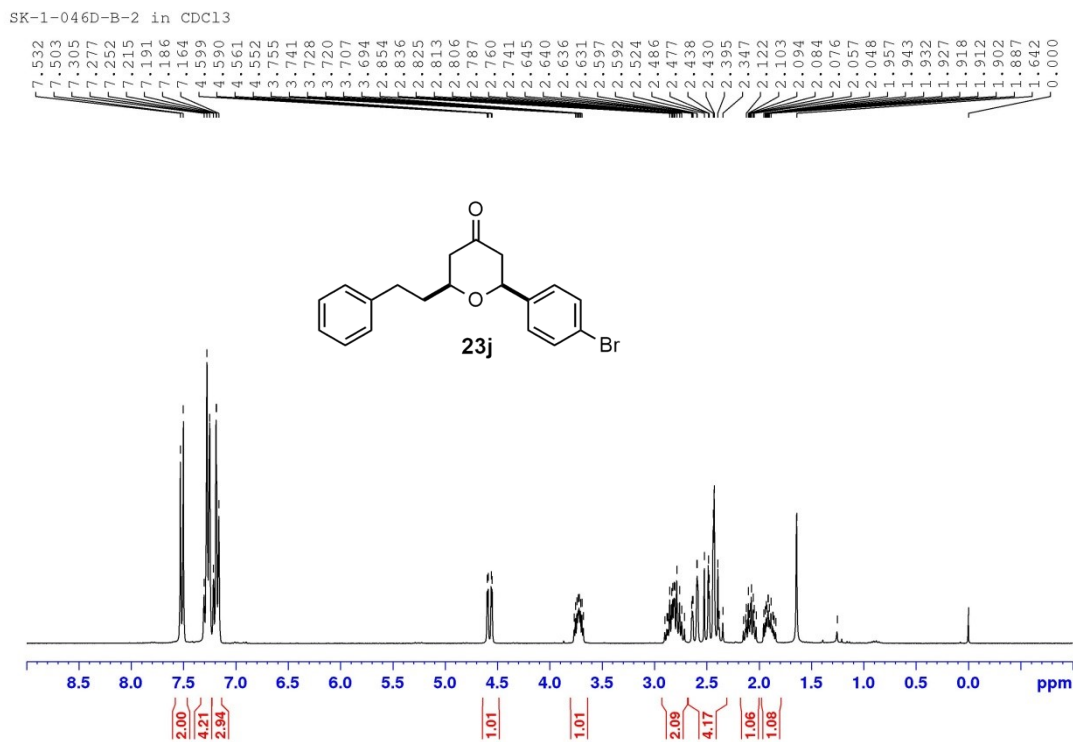

**Figure SI28.** <sup>13</sup>C NMR (75 MHz, CDCl<sub>3</sub>) spectrum of 2-(4-bromophenyl)-6-phenethyl-tetrahydropyran-4-one (**23j**)

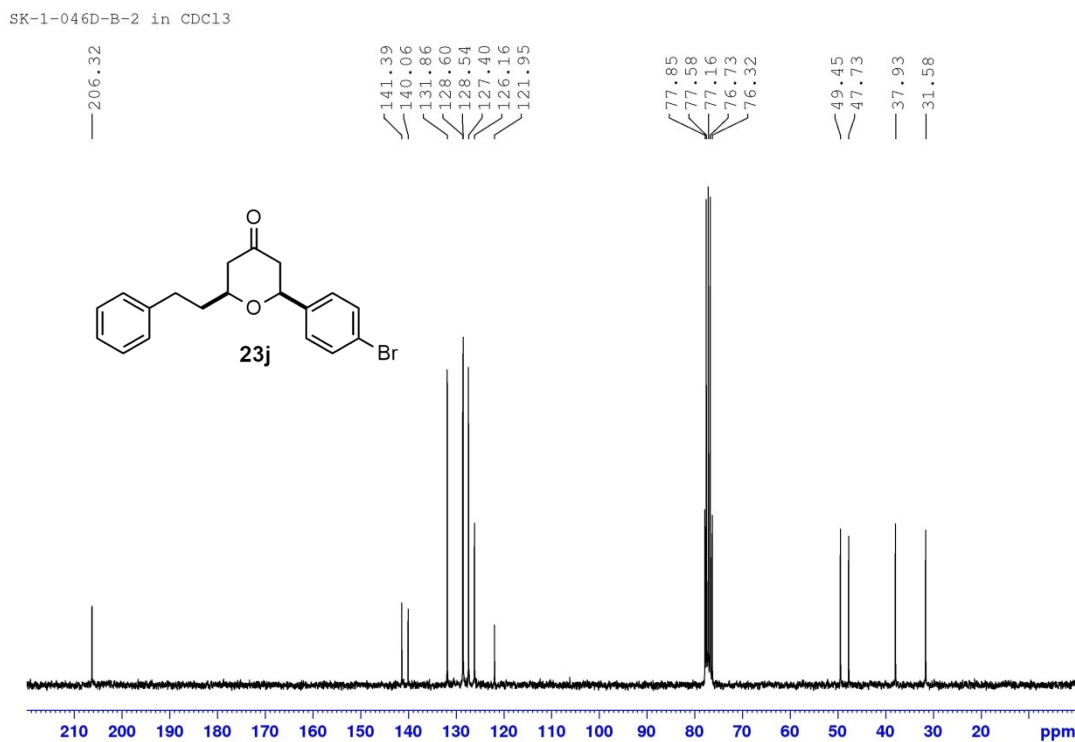

**Figure SI29.** <sup>13</sup>C NMR (300 MHz, CDCl<sub>3</sub>) spectrum of 2-(4-chlorophenyl)-6-phenethyl-tetrahydropyran-4-one (**23k**)

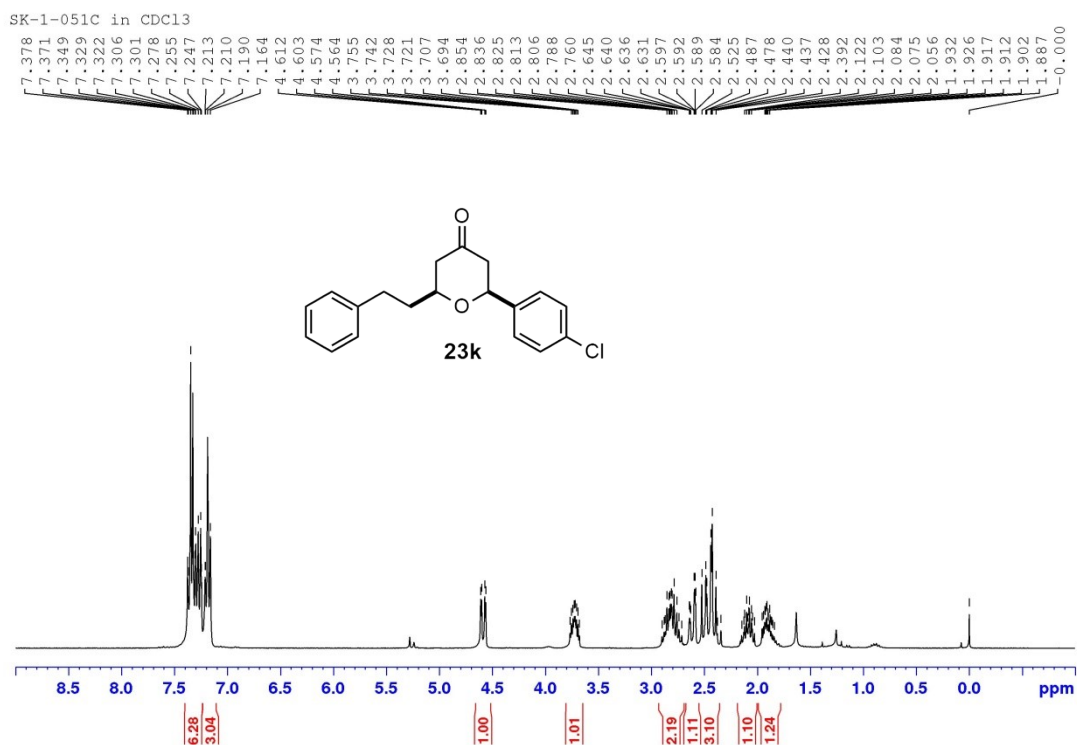

**Figure SI30.** <sup>13</sup>C NMR (75 MHz, CDCl<sub>3</sub>) spectrum of 2-(4-bromophenyl)-6-phenethyl-tetrahydropyran-4-one (**23k**)

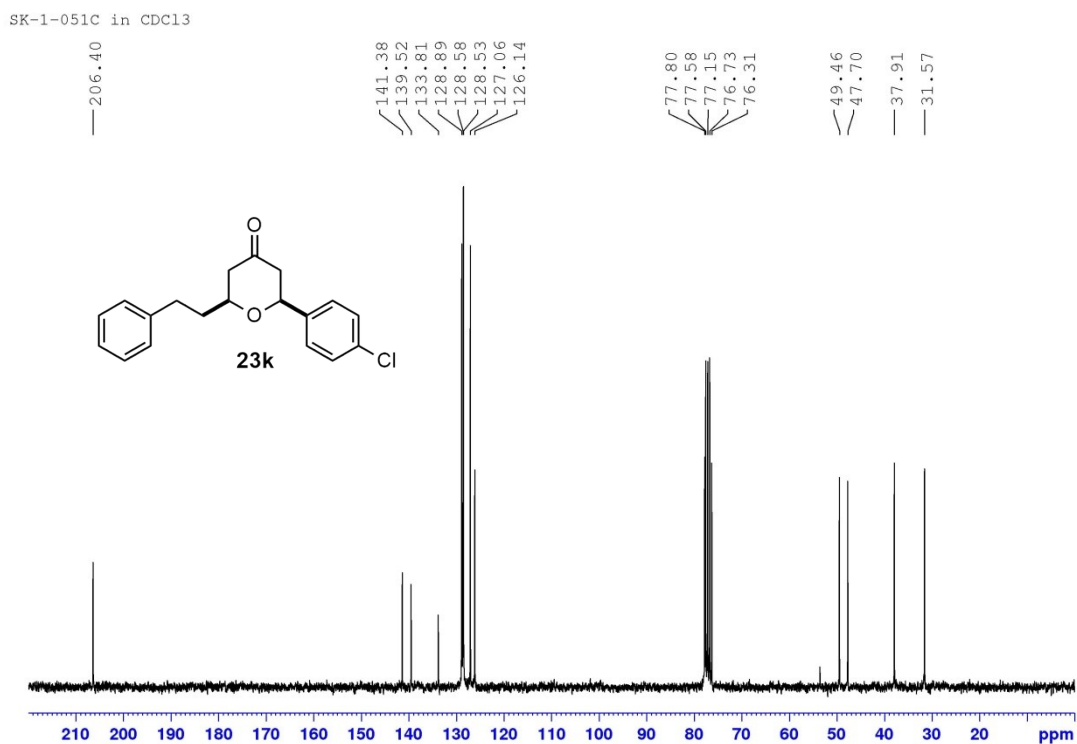

**Figure SI31.** <sup>1</sup>H NMR (300 MHz, CDCl<sub>3</sub>) spectrum of 2-(4-methoxyphenyl)-6-phenethyltetrahydropyran-4-one (**23l**)

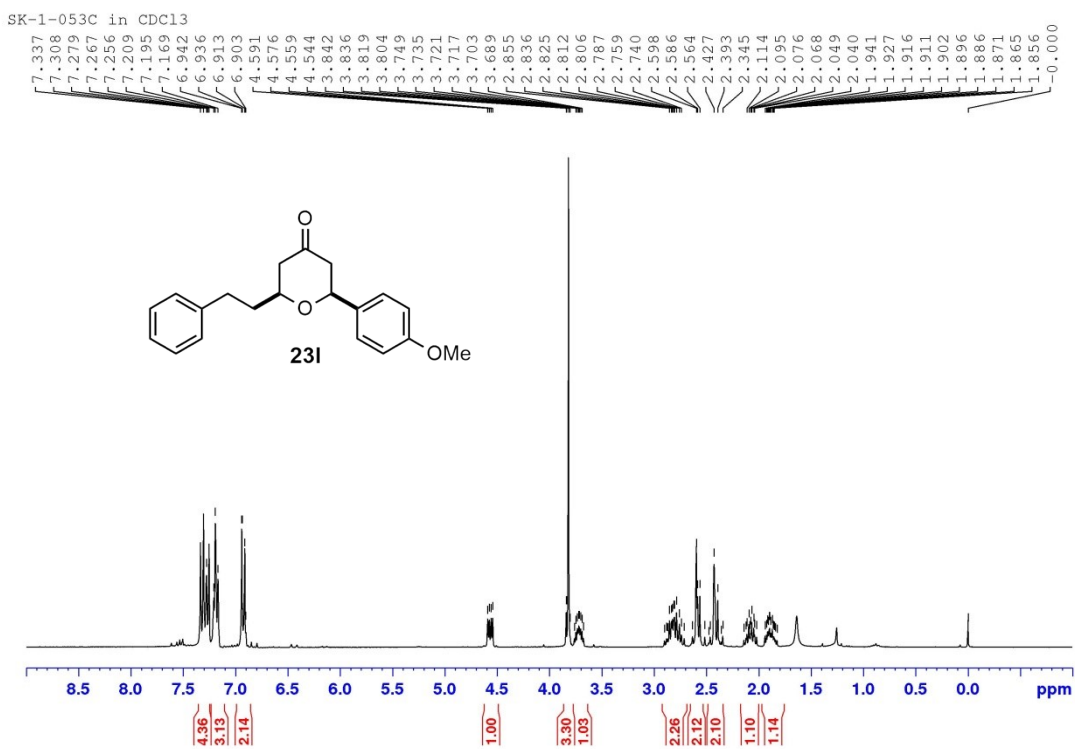

**Figure SI32.** <sup>13</sup>C NMR (75 MHz, CDCl<sub>3</sub>) spectrum of 2-(4-methoxyphenyl)-6-phenethyltetrahydropyran-4-one (**23l**)

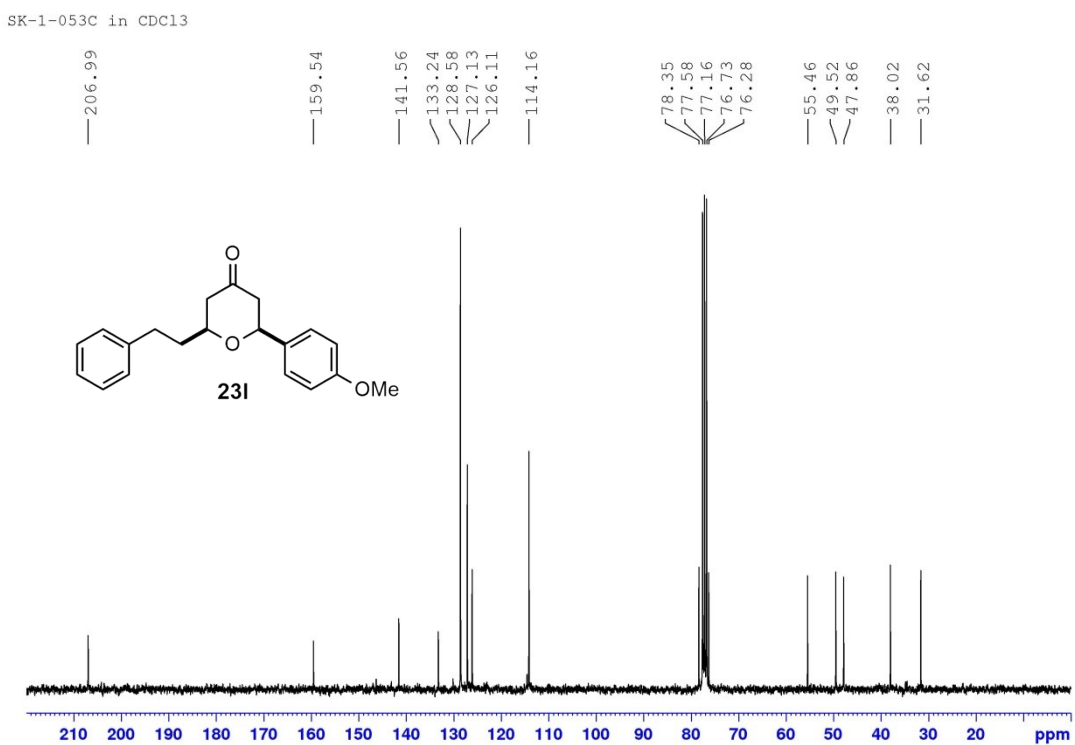

**Figure SI33.** <sup>13</sup>C NMR (75 MHz, CDCl<sub>3</sub>) spectrum of 2-(3-methoxyphenyl)-6-phenethyltetrahydropyran-4-one (**23m**)

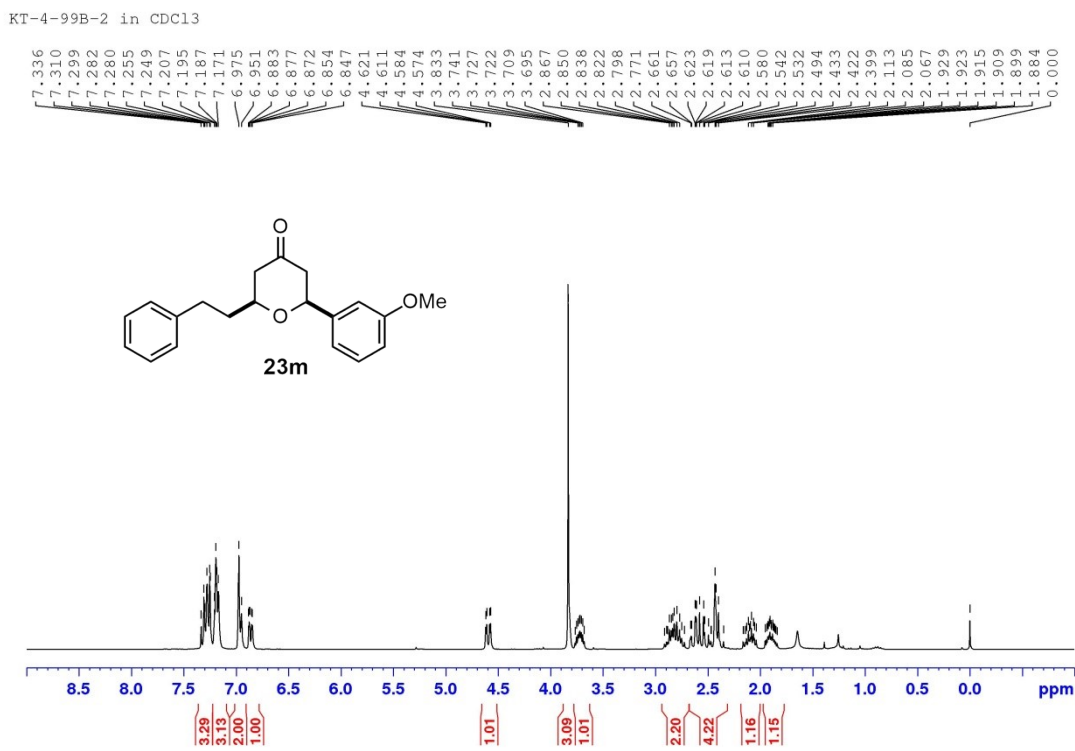

**Figure SI34.** <sup>13</sup>C NMR (75 MHz, CDCl<sub>3</sub>) spectrum of 2-(3-methoxyphenyl)-6-phenethyltetrahydropyran-4-one (**23m**)

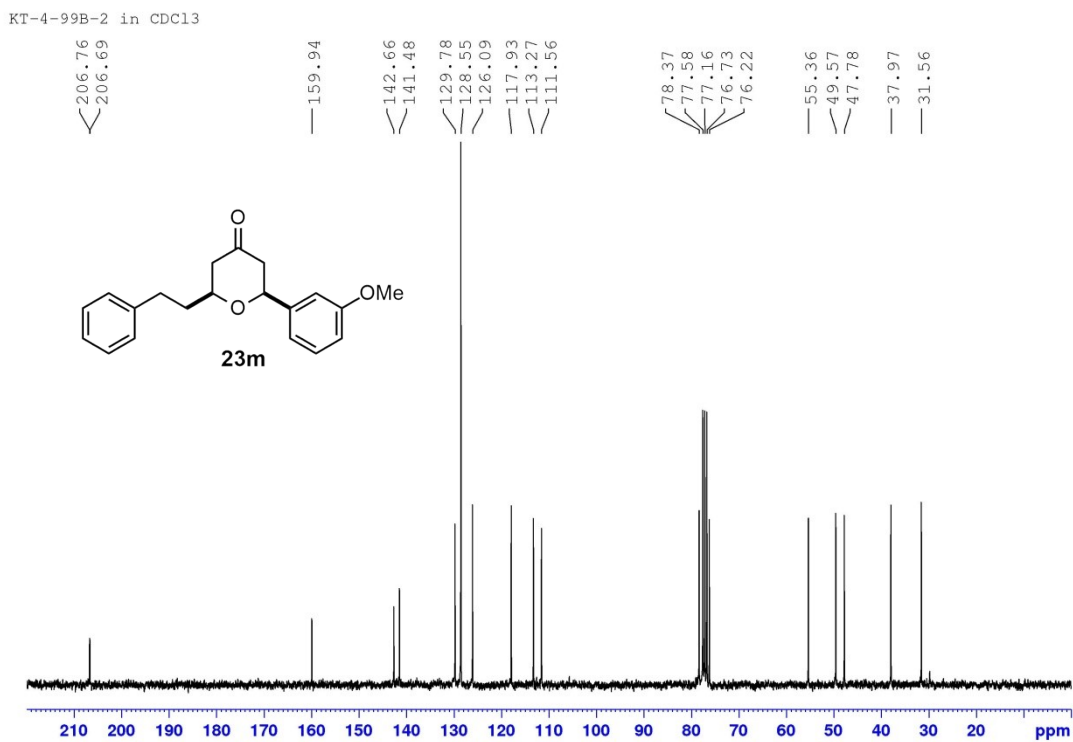

**Figure SI35.** <sup>1</sup>H NMR (300 MHz, CDCl<sub>3</sub>) spectrum of 2-(2-methoxyphenyl)-6-phenethyltetrahydropyran-4-one (**23n**)

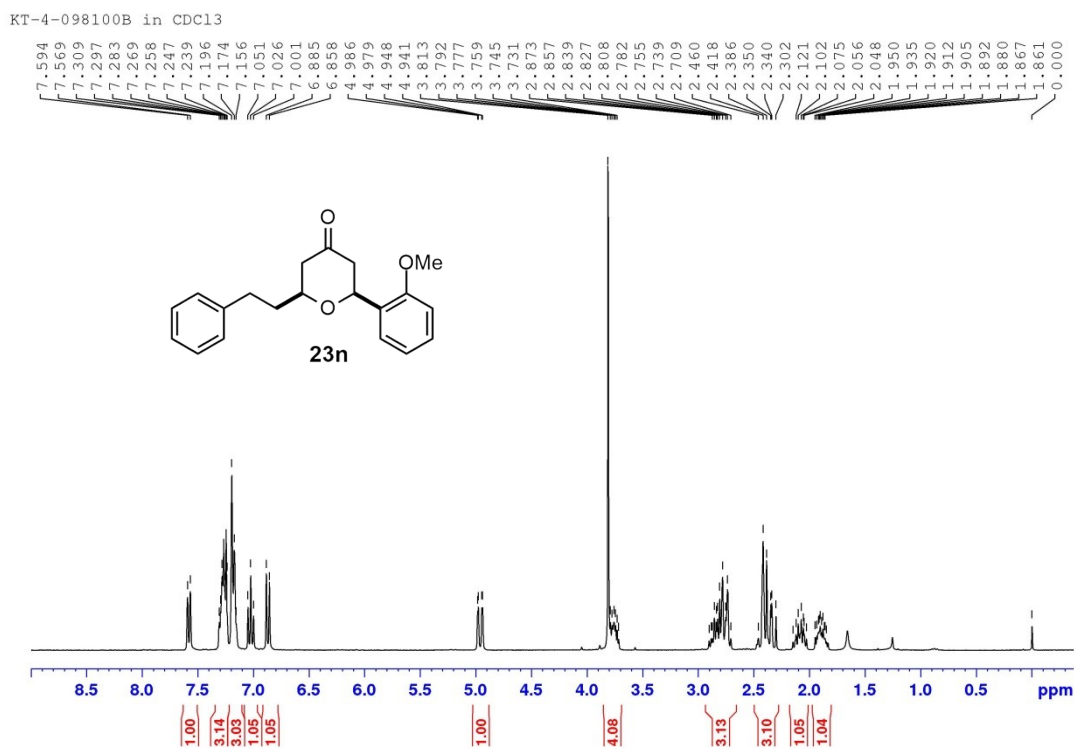

**Figure SI36.** <sup>13</sup>C NMR (75 MHz, CDCl<sub>3</sub>) spectrum of 2-(3-methoxyphenyl)-6-phenethyltetrahydropyran-4-one (**23n**)

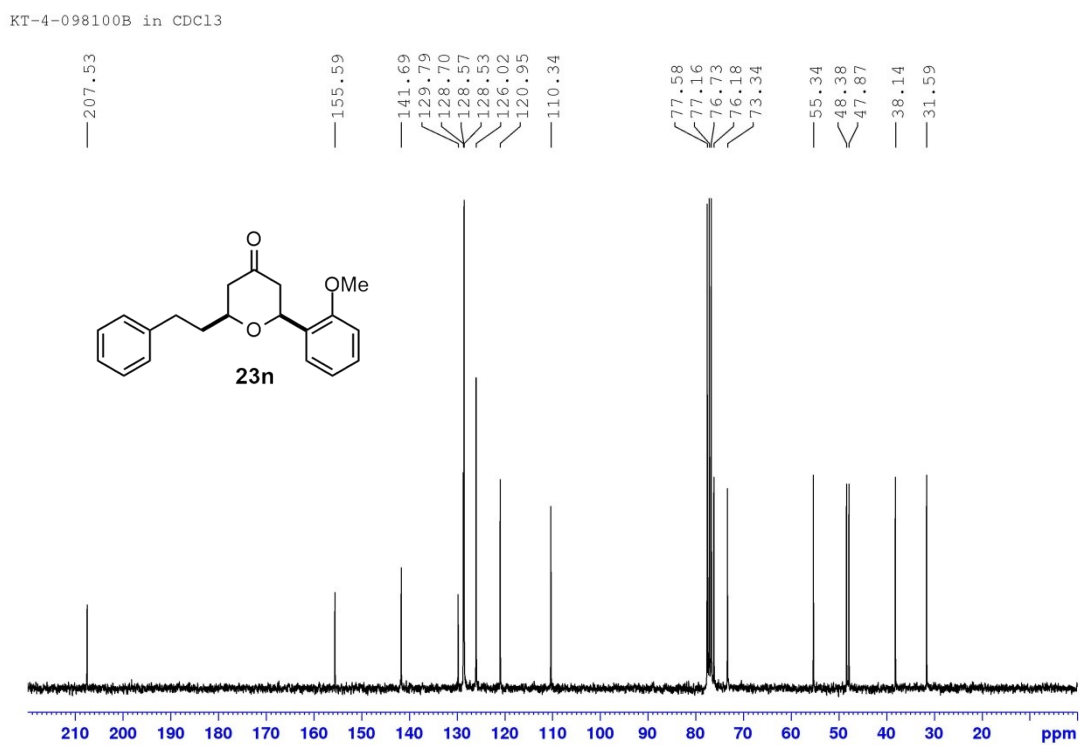

**Figure SI37.** <sup>1</sup>H NMR (300 MHz, CDCl<sub>3</sub>) spectrum of 2-phenethyl-6-styryltetrahydropyran-4-one (**23o**)



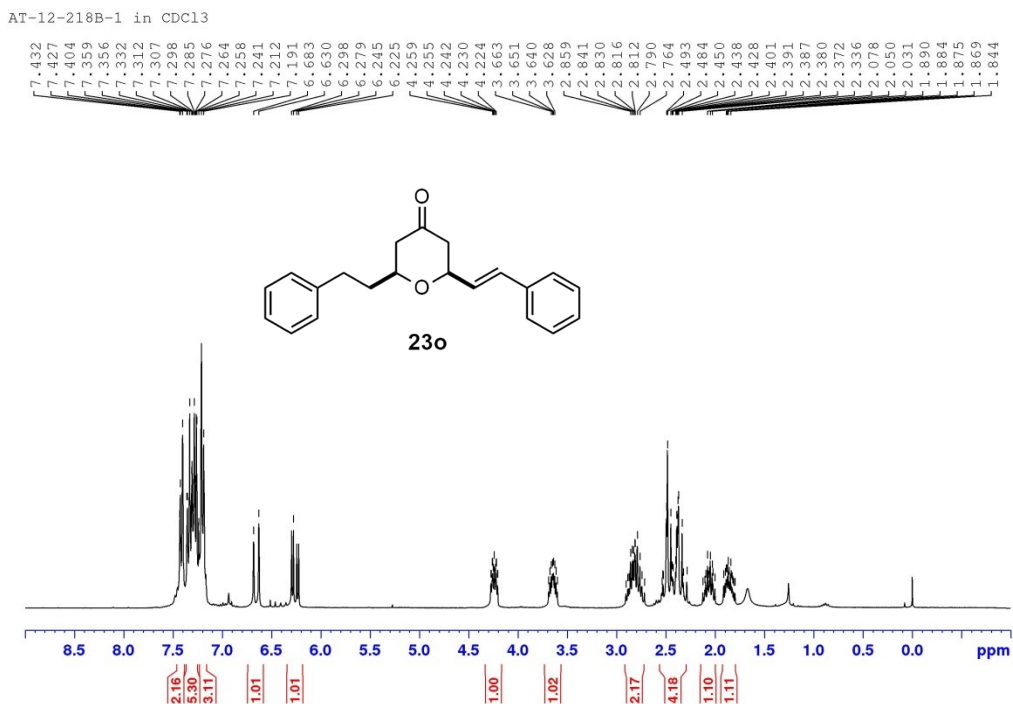

**Figure SI38.** <sup>13</sup>C NMR (75 MHz, CDCl<sub>3</sub>) spectrum of 2-phenethyl-6-styryltetrahydropyran-4-one (**23o**)

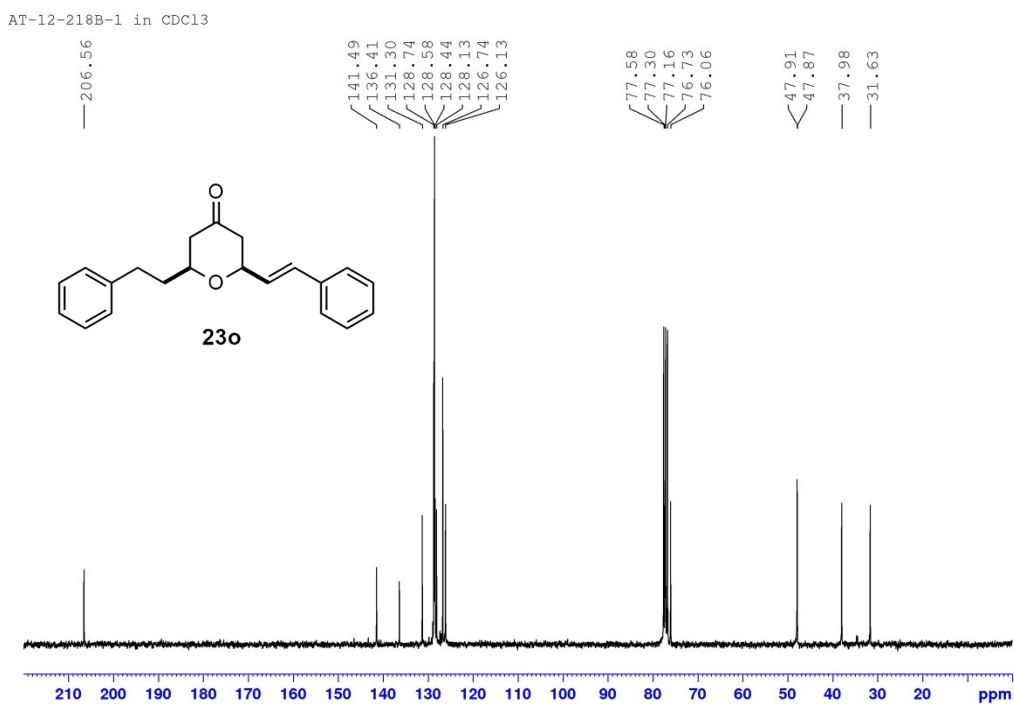

**Figure SI39.** <sup>1</sup>H NMR (300 MHz, CDCl<sub>3</sub>) spectrum of 2-(3-benzoyloxypropyl)-6-cyclohexyltetrahydropyran-4-one (**23p**)

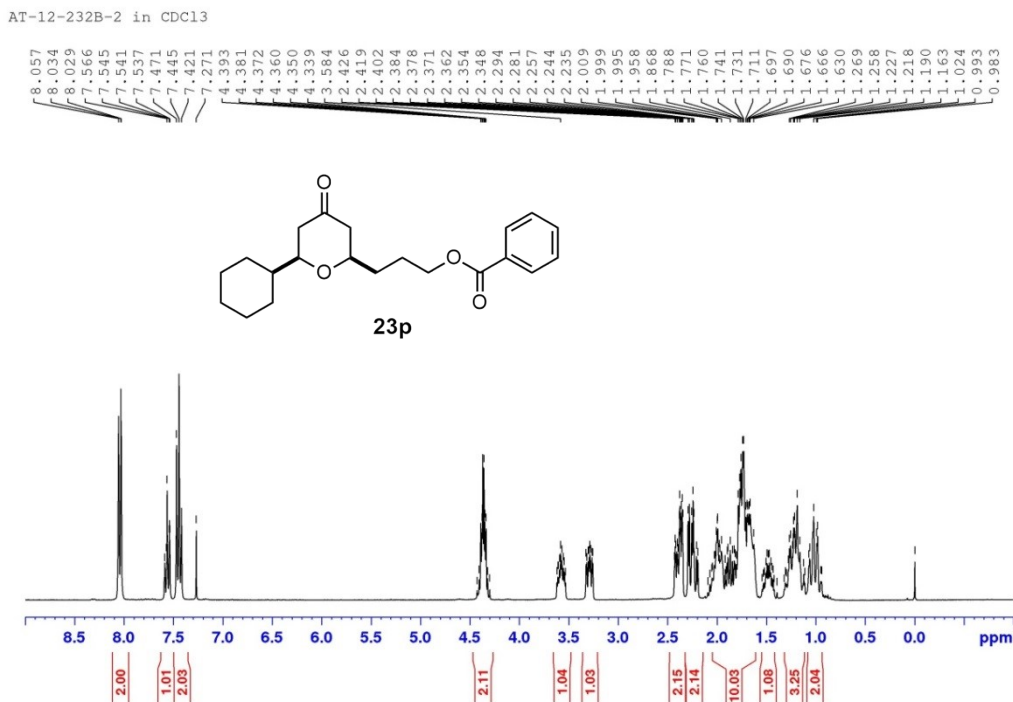

**Figure SI40.** <sup>13</sup>C NMR (75 MHz, CDCl<sub>3</sub>) spectrum of 2-(3-benzoyloxypropyl)-6-cyclohexyltetrahydropyran-4-one (**23p**)

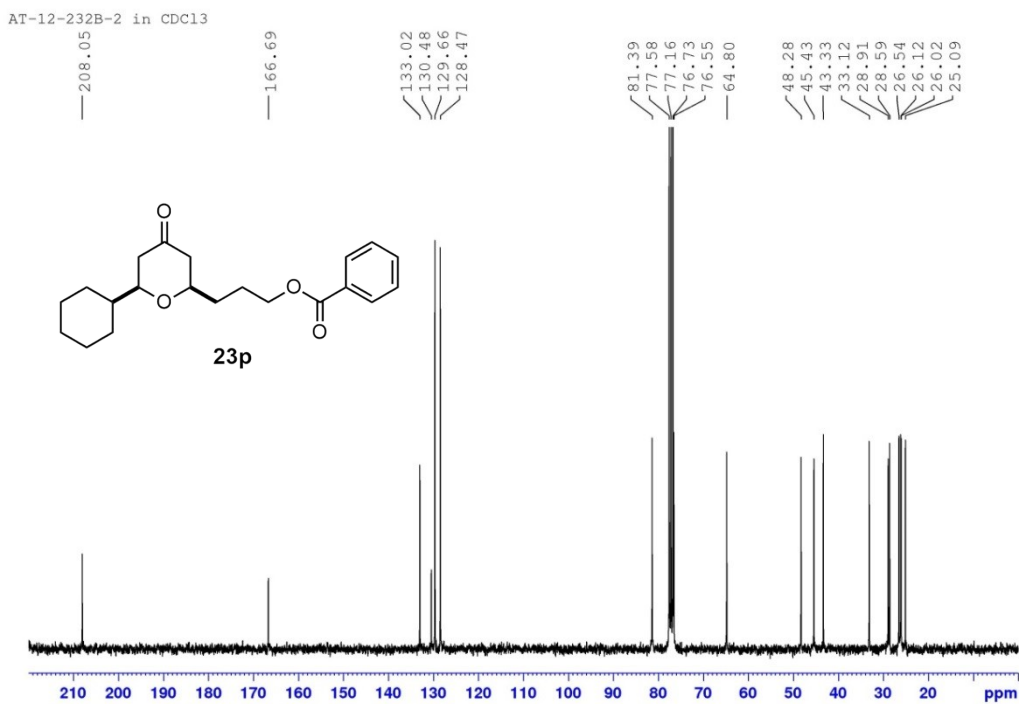

**Figure SI41.** <sup>1</sup>H NMR (300 MHz, CDCl<sub>3</sub>) spectrum of 2-cyclohexyl-6-propyltetrahydropyran-4-one (**23q**)

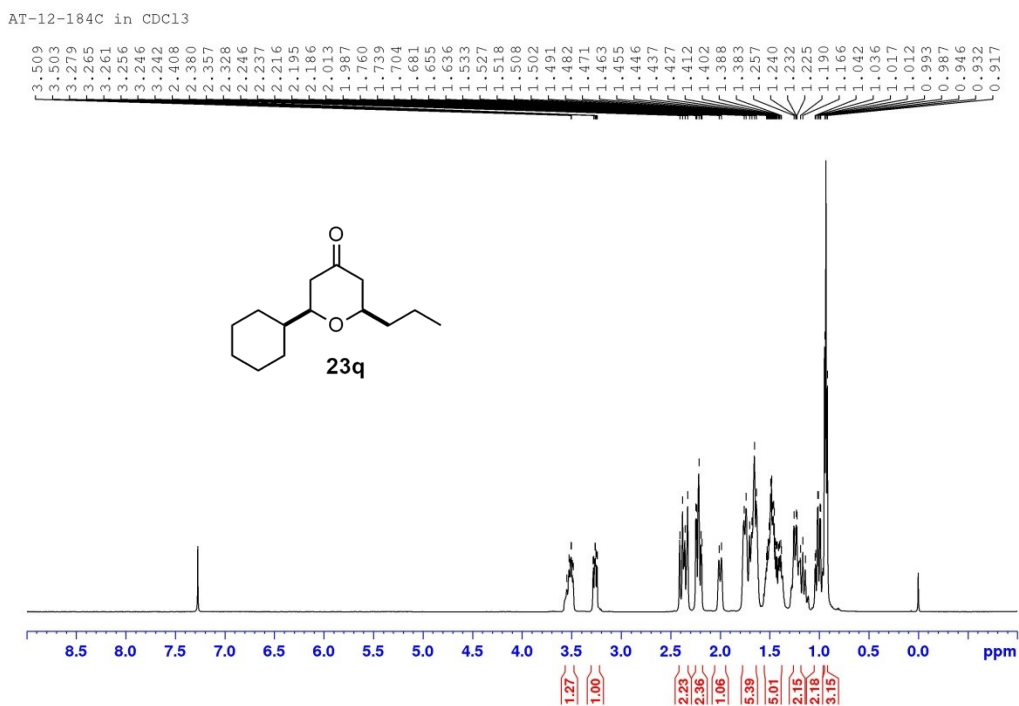

**Figure SI42.** <sup>13</sup>C NMR (75 MHz, CDCl<sub>3</sub>) spectrum of 2-cyclohexyl-6-propyltetrahydropyran-4-one (**23q**)

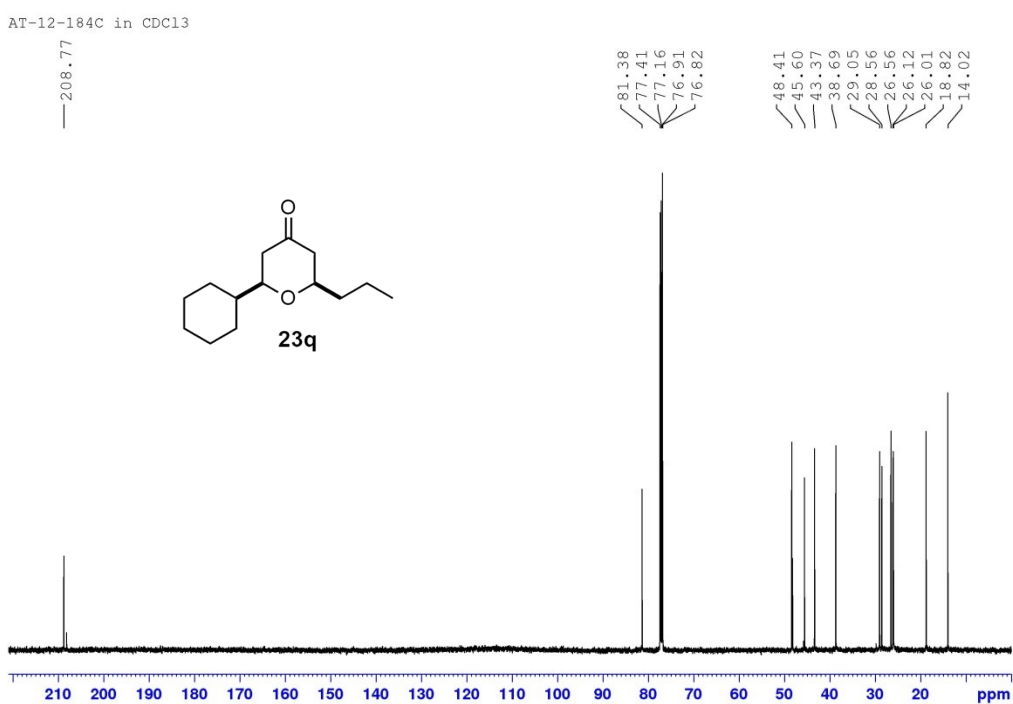

**Figure SI43.** <sup>1</sup>H NMR (300 MHz, CDCl<sub>3</sub>) spectrum of 2,6-dicyclohexyltetrahydropyran-4-one (**23r**)

SK-1-071B in CDCl<sub>3</sub>

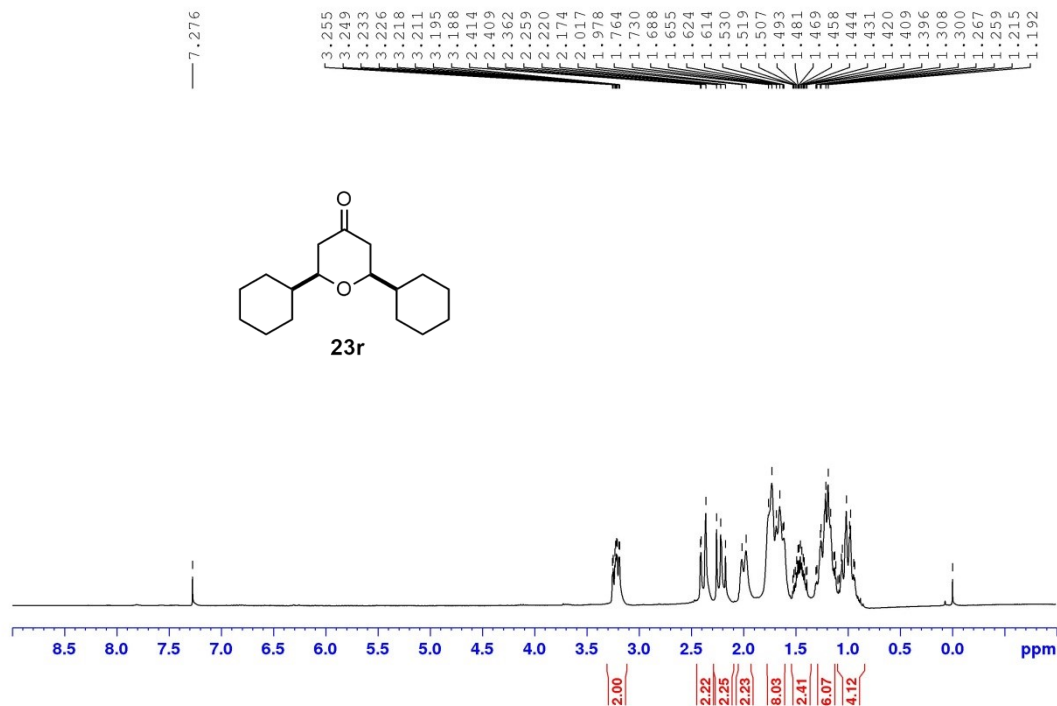

**Figure SI44.** <sup>13</sup>C NMR (75 MHz, CDCl<sub>3</sub>) spectrum of 2,6-dicyclohexyltetrahydropyran-4-one (**23r**)

SK-1-071B in CDCl<sub>3</sub>

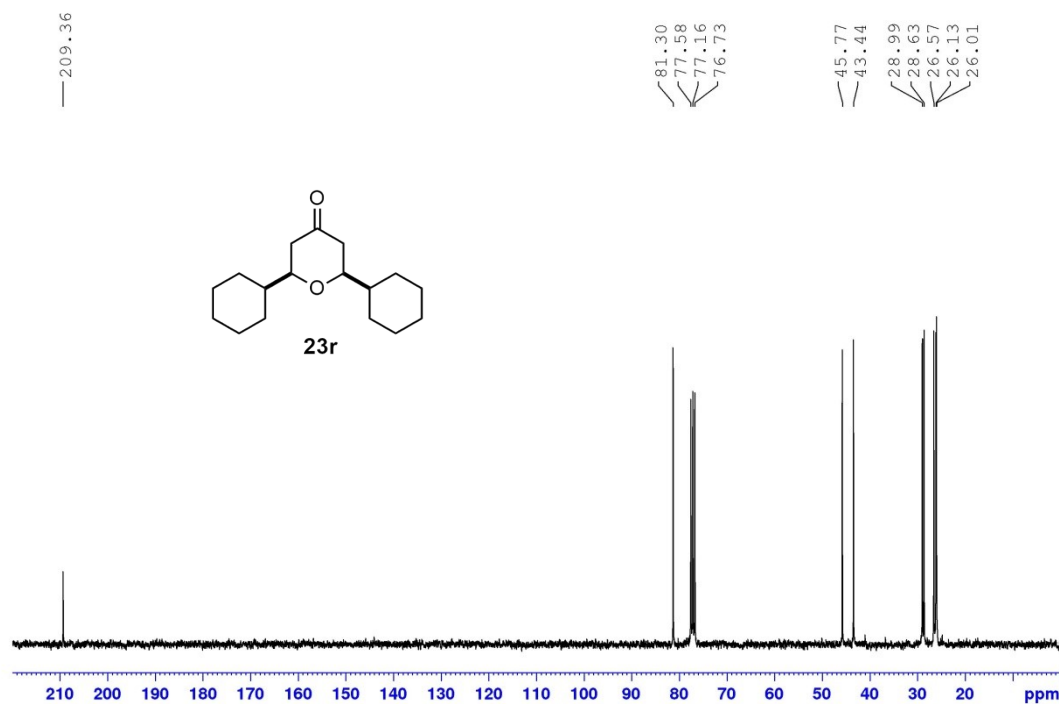

**Figure SI45.** <sup>1</sup>H NMR (500 MHz, CDCl<sub>3</sub>) spectrum of 2-cyclohexyl-6-(4-nitrophenyl) tetrahydropyran-4-one (**23s**)

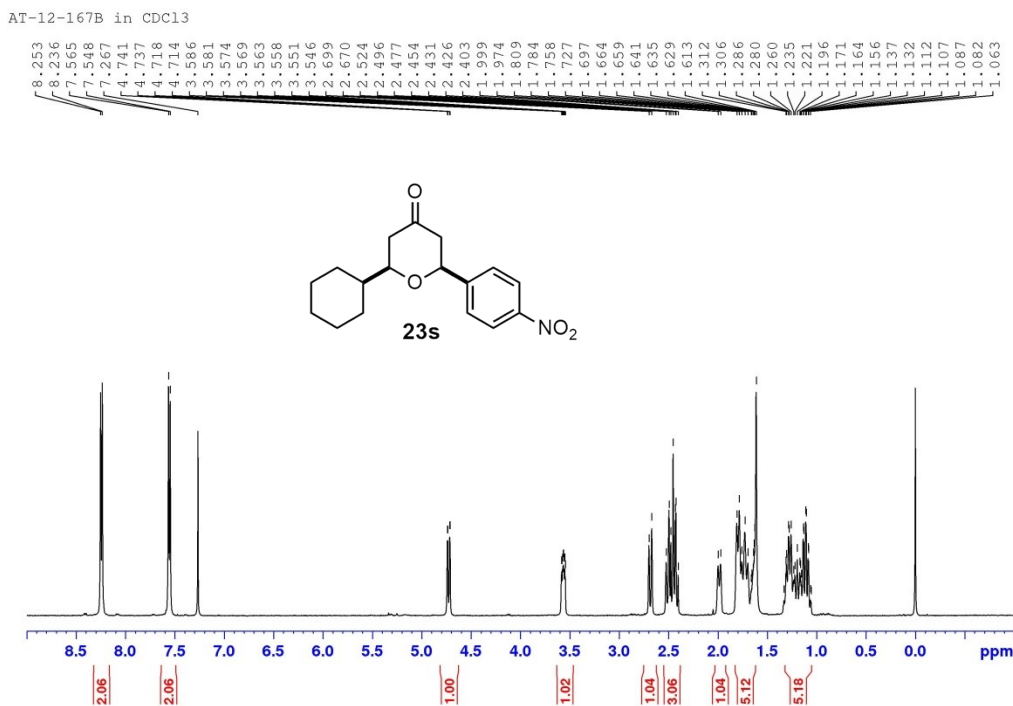

**Figure SI46.** <sup>13</sup>C NMR (125 MHz, CDCl<sub>3</sub>) spectrum of 2-cyclohexyl-6-(4-nitrophenyl) tetrahydropyran-4-one (**23s**)

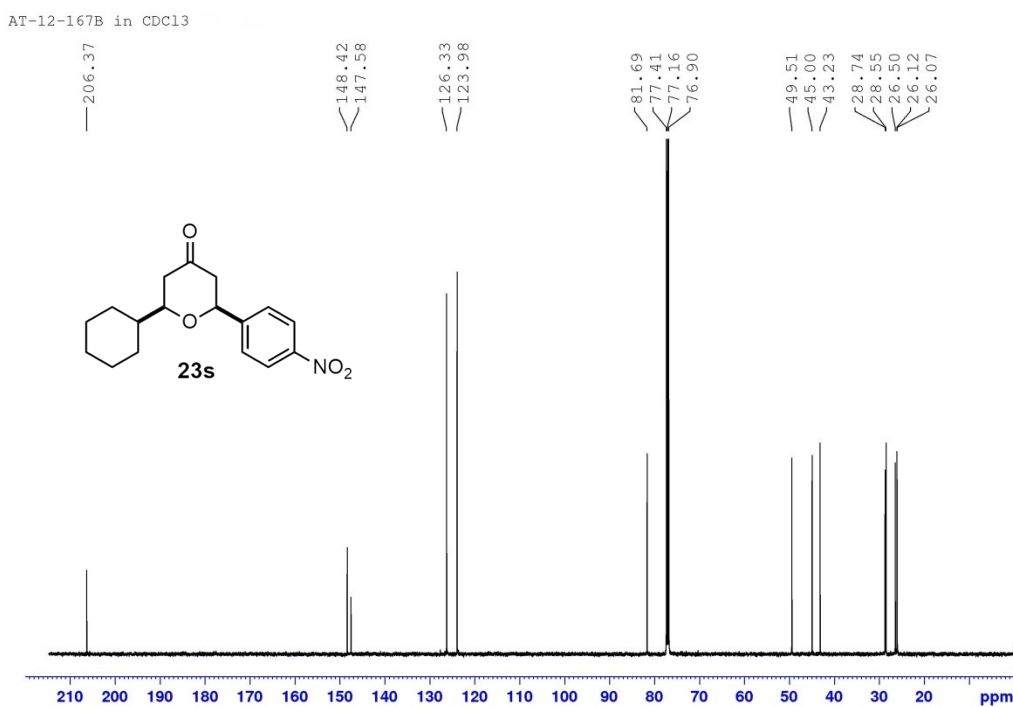

**Figure SI47.** <sup>1</sup>H NMR (300 MHz, CDCl<sub>3</sub>) spectrum of 2-Cyclohexyl-6-(4-methoxyphenyl)tetrahydropyran-4-one (**23t**)

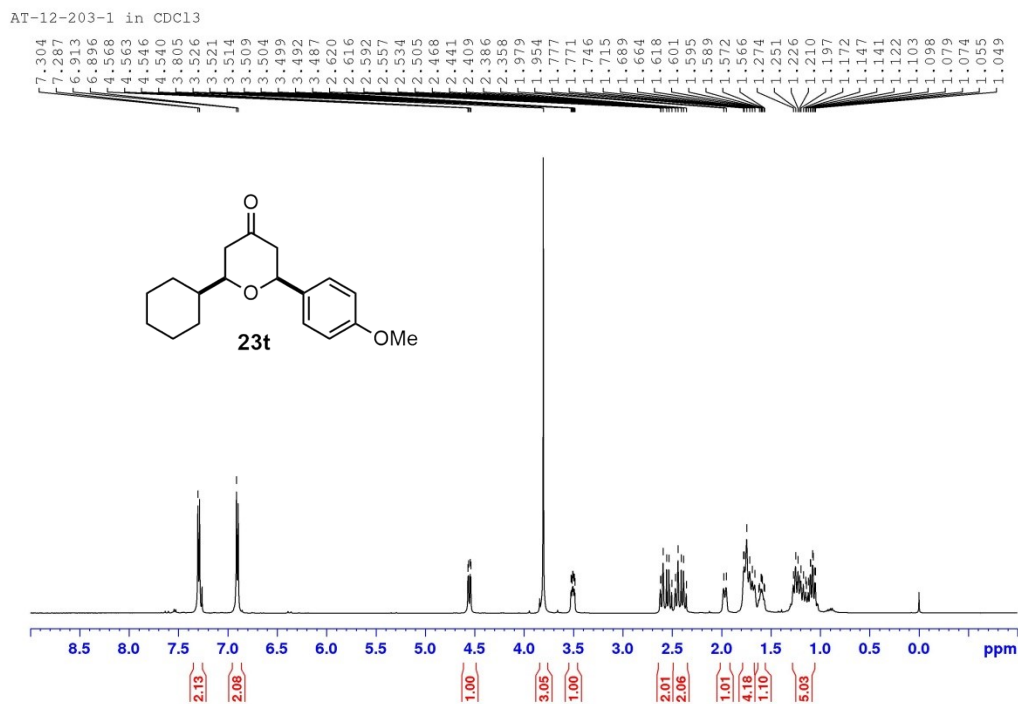

**Figure SI48.** <sup>13</sup>C NMR (75 MHz, CDCl<sub>3</sub>) spectrum of 2-cyclohexyl-6-(4-methoxyphenyl)tetrahydropyran-4-one (**23t**)

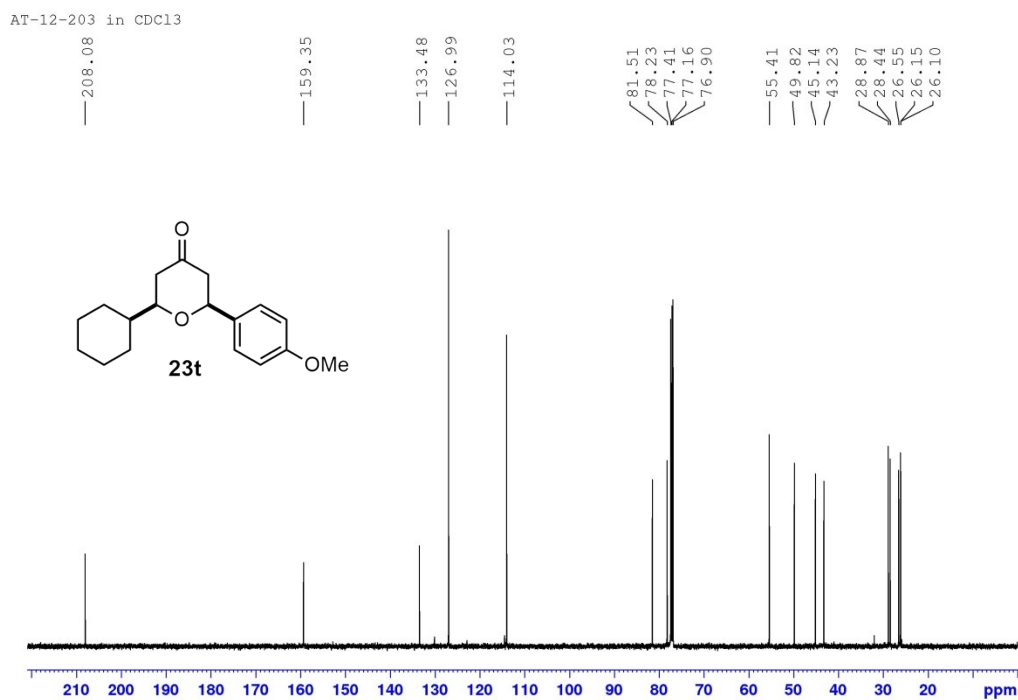

**Figure SI49.** <sup>1</sup>H NMR (300 MHz, CDCl<sub>3</sub>) spectrum of 2-isopropyl-6-phenyltetrahydropyran-4-one (**23u**)

PV-3-036C in CDCl<sub>3</sub>

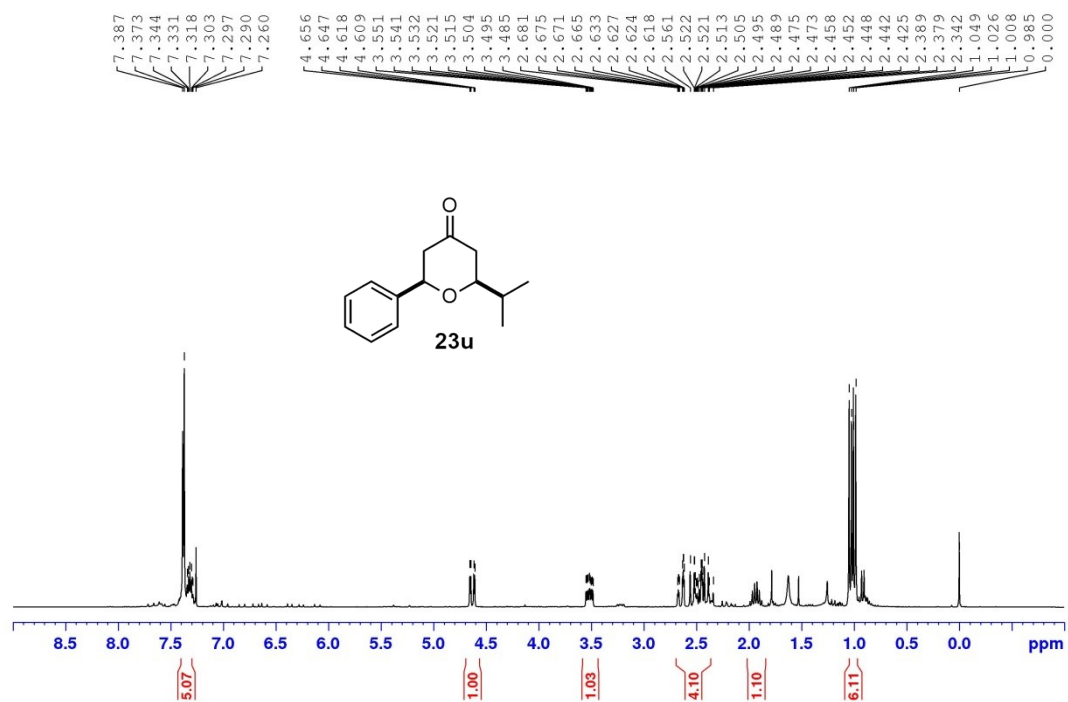

**Figure SI50.** <sup>13</sup>C NMR (75 MHz, CDCl<sub>3</sub>) spectrum of 2-isopropyl-6-phenyltetrahydropyran-4-one (**23u**)

AT-12-213A-2 in CDCl<sub>3</sub>

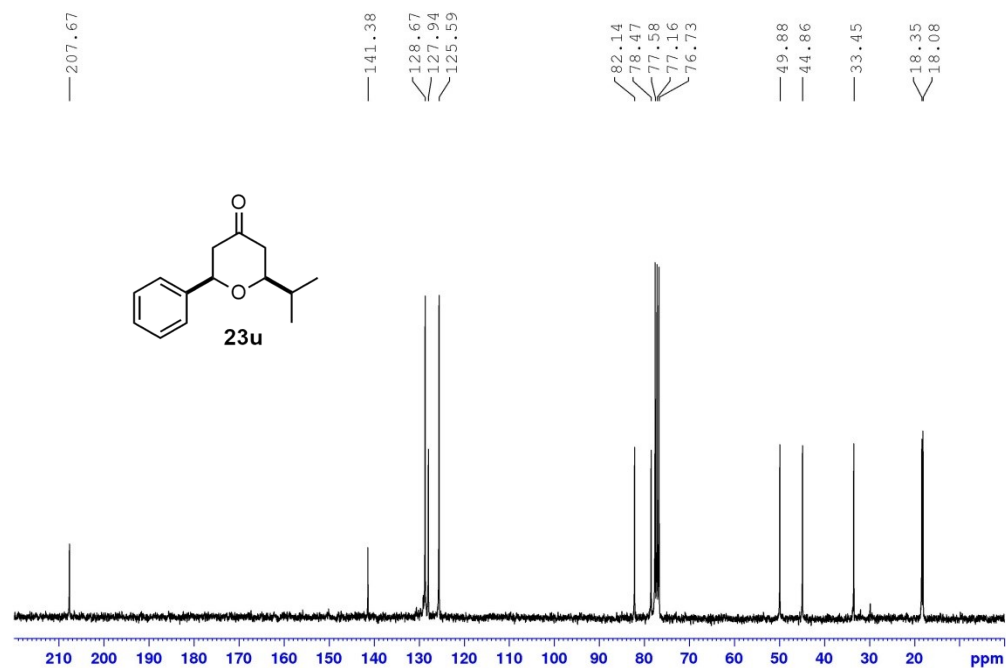

**Figure SI51.** <sup>1</sup>H NMR (300 MHz, CDCl<sub>3</sub>) spectrum of 2,6-diisopropyltetrahydropyran-4-one (**23v**)

AT-12-220A in CDCl<sub>3</sub>

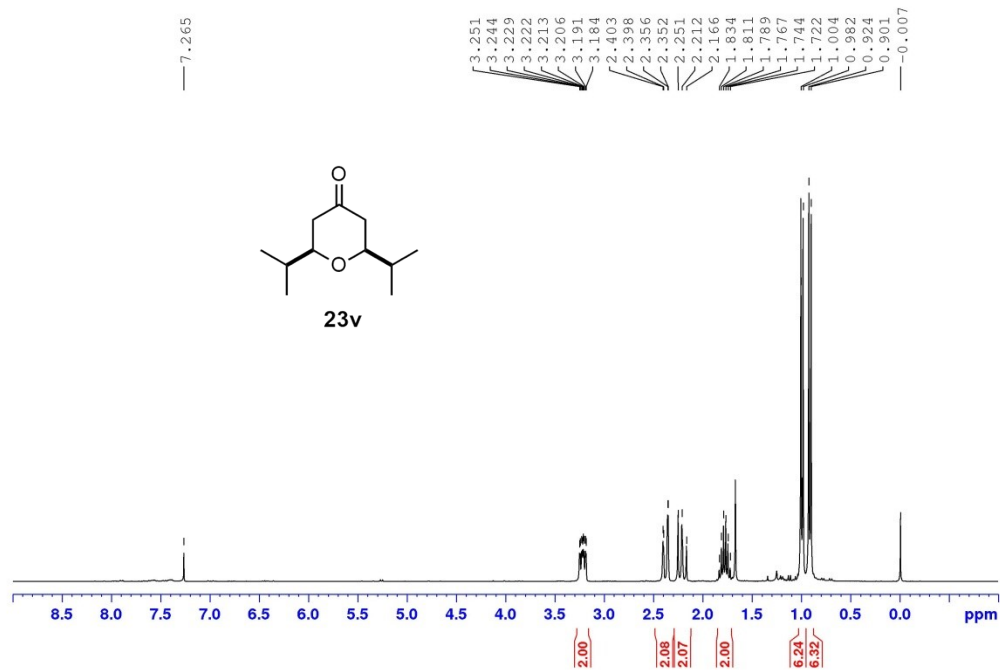

**Figure SI52.** <sup>13</sup>C NMR (75 MHz, CDCl<sub>3</sub>) spectrum of 2,6-diisopropyltetrahydropyran-4-one (**23v**)

AT-12-220A in CDCl<sub>3</sub>

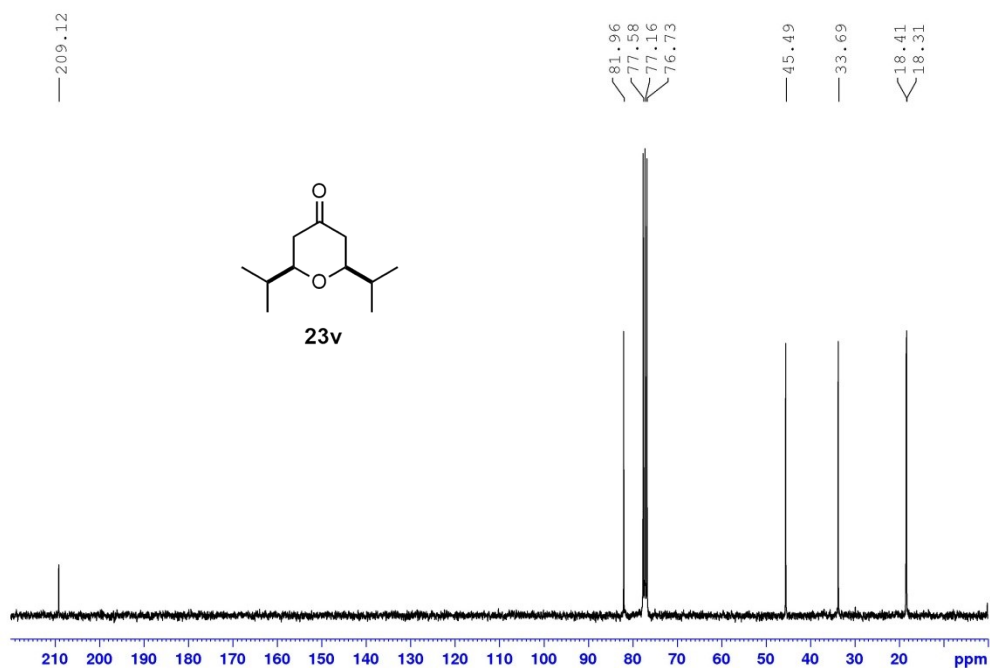

**Figure SI53.** <sup>1</sup>H NMR (300 MHz, CDCl<sub>3</sub>) spectrum of 2,6-diphenyltetrahydropyran-4-one (**23w**)



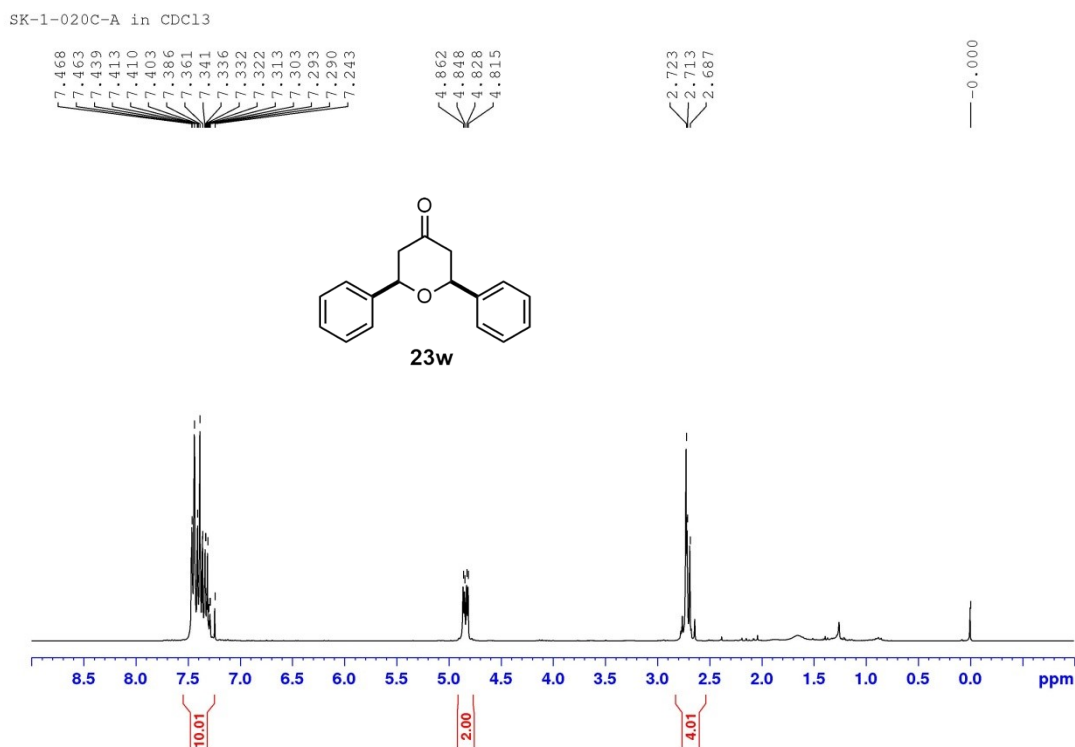

**Figure SI54.** <sup>13</sup>C NMR (75 MHz, CDCl<sub>3</sub>) spectrum of 2,6-diphenyltetrahydropyran-4-one (**23w**)

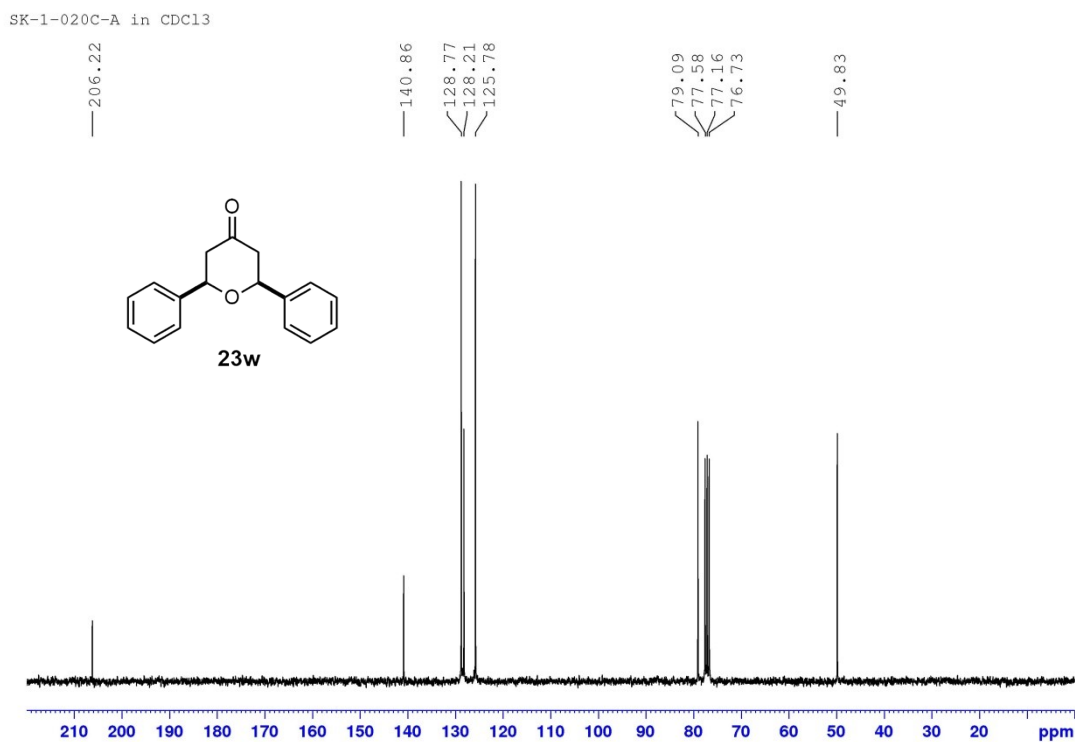

**Figure SI55.** <sup>1</sup>H NMR (300 MHz, CDCl<sub>3</sub>) spectrum of 2-(4-nitrophenyl)-6-phenyltetrahydropyran-4-one (**23x**)

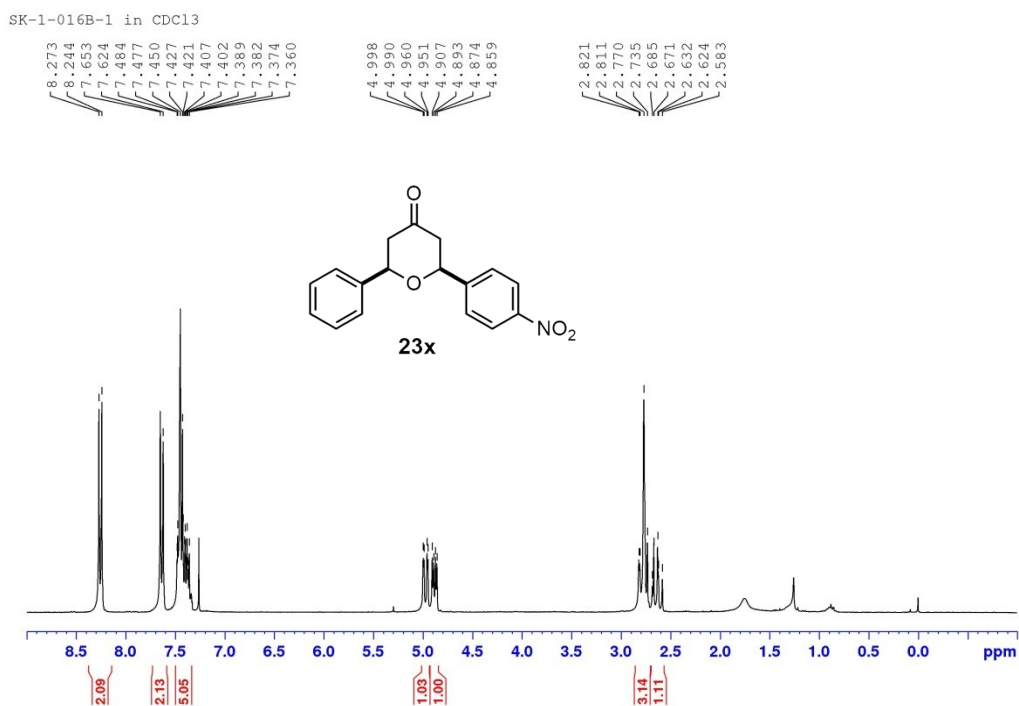

**Figure SI56.** <sup>13</sup>C NMR (75 MHz, CDCl<sub>3</sub>) spectrum of 2-(4-nitrophenyl)-6-phenyltetrahydropyran-4-one (**23x**)

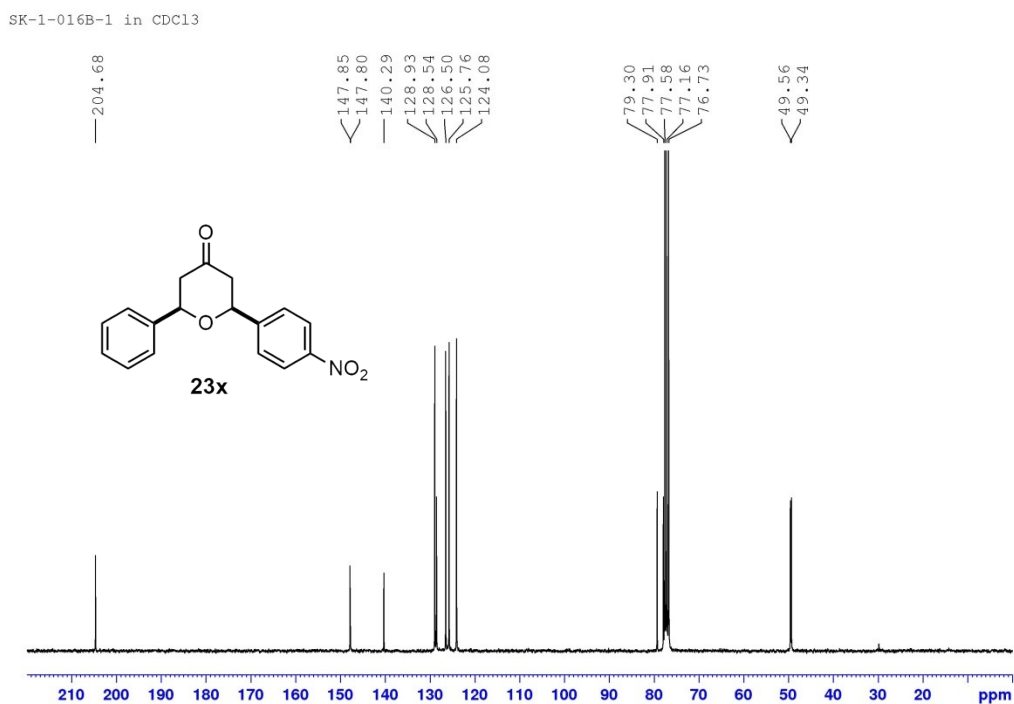

**Figure SI57.** <sup>1</sup>H NMR (300 MHz, CDCl<sub>3</sub>) spectrum of 2-(3-methoxyphenyl)-6-phenyltetrahydropyran-4-one (**23y**)

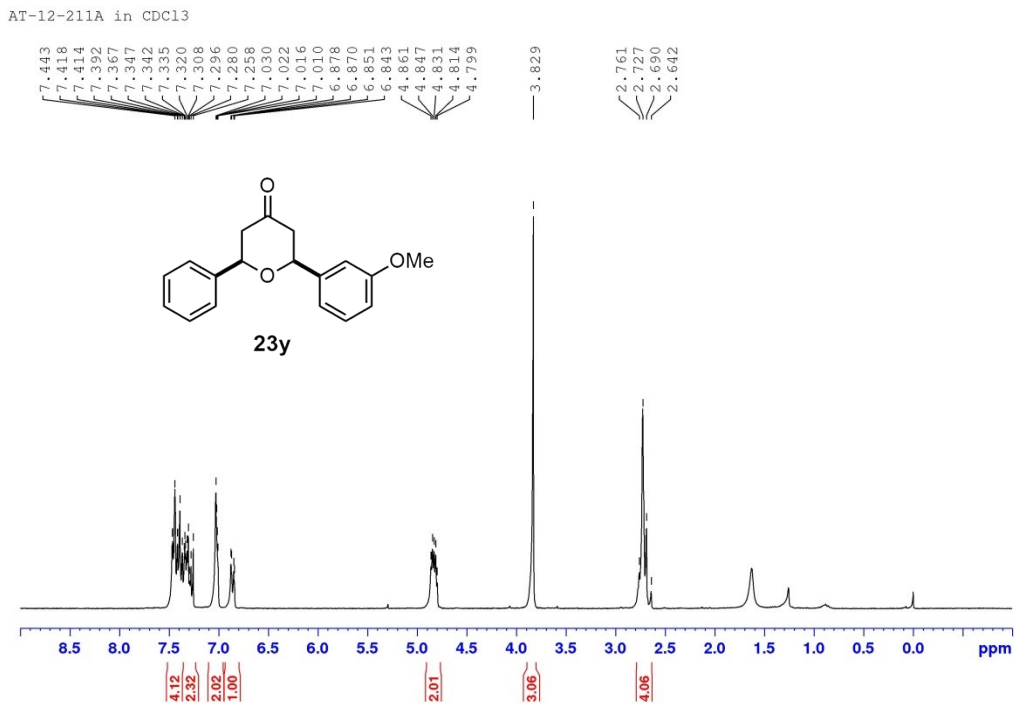

**Figure SI58.** <sup>13</sup>C NMR (75 MHz, CDCl<sub>3</sub>) spectrum of 2-(3-methoxyphenyl)-6-phenyl-tetrahydropyran-4-one (**23y**)

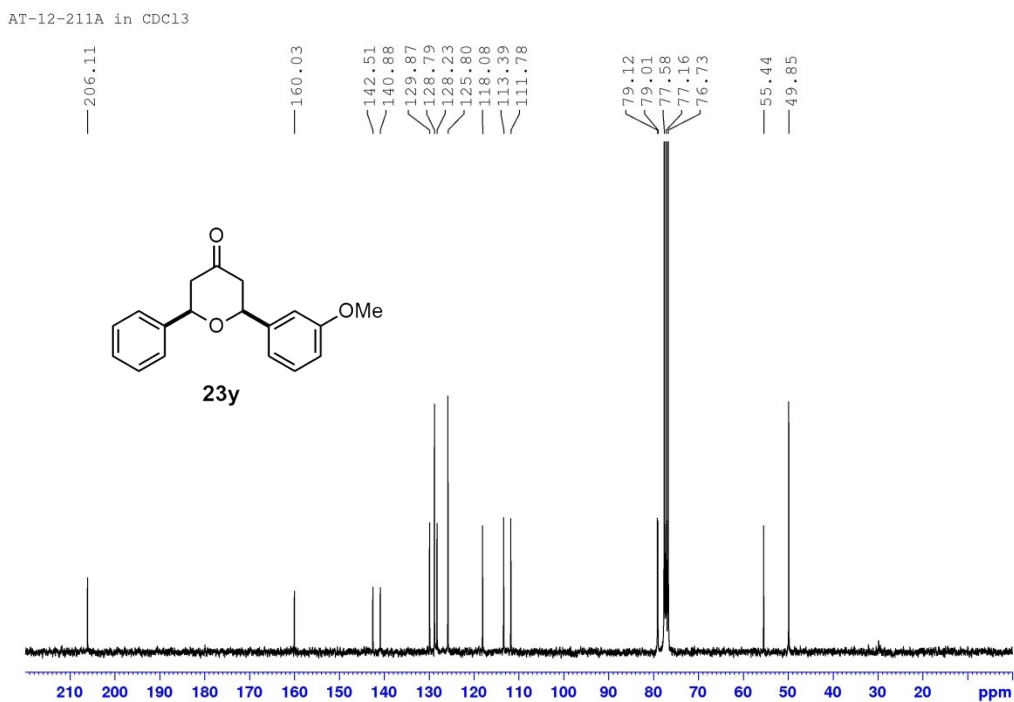

**Figure SI59.** <sup>1</sup>H NMR (300 MHz, CDCl<sub>3</sub>) spectrum of 3-chloro-1-(3-methoxyphenyl)but-3-en-1-ol (**23z**)

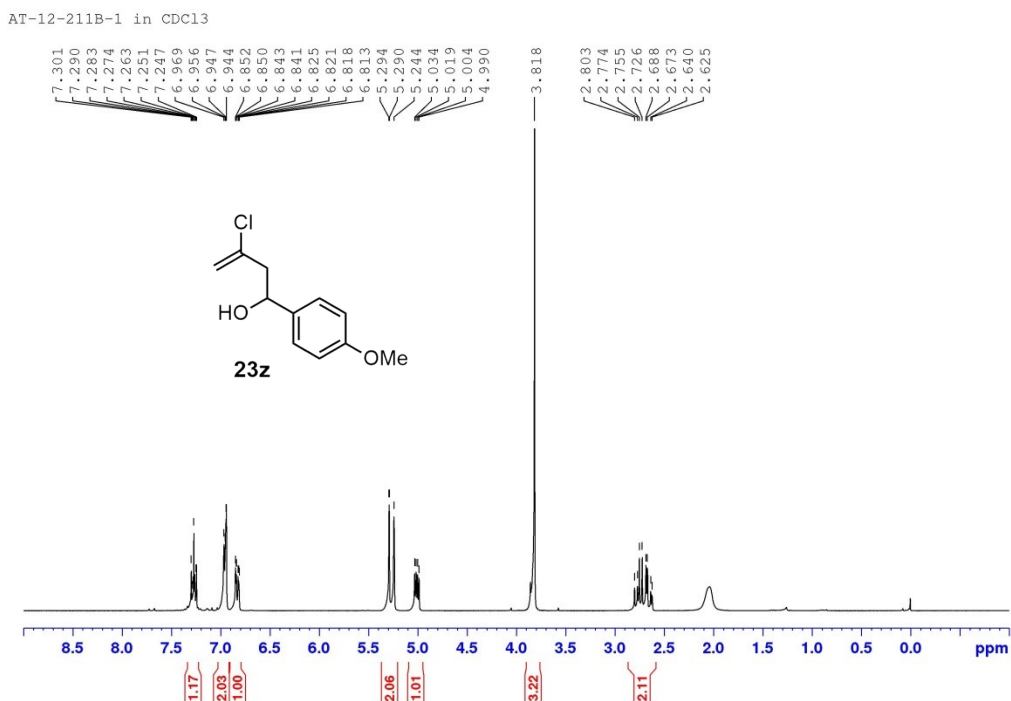

**Figure SI60.** <sup>13</sup>C NMR (75 MHz, CDCl<sub>3</sub>) spectrum of 3-chloro-1-(3-methoxyphenyl)but-3-en-1-ol (**23z**)

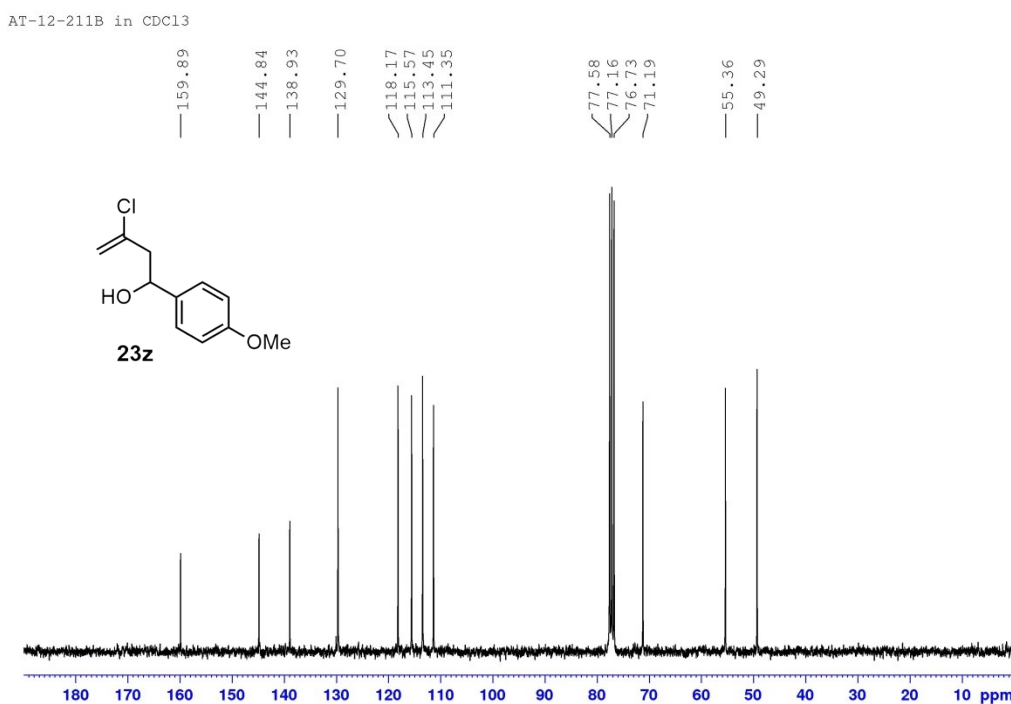

#### 4. NOE Spectra of Selected Compounds

**Figure SI61.** NOE spectra (A) irradiation of  $^1\text{H}$  at 3.23 ppm B) irradiation of  $^1\text{H}$  at 3.49 ppm of 2-isopropyl-6-phenethyltetrahydropyran-4-one (**23e**)

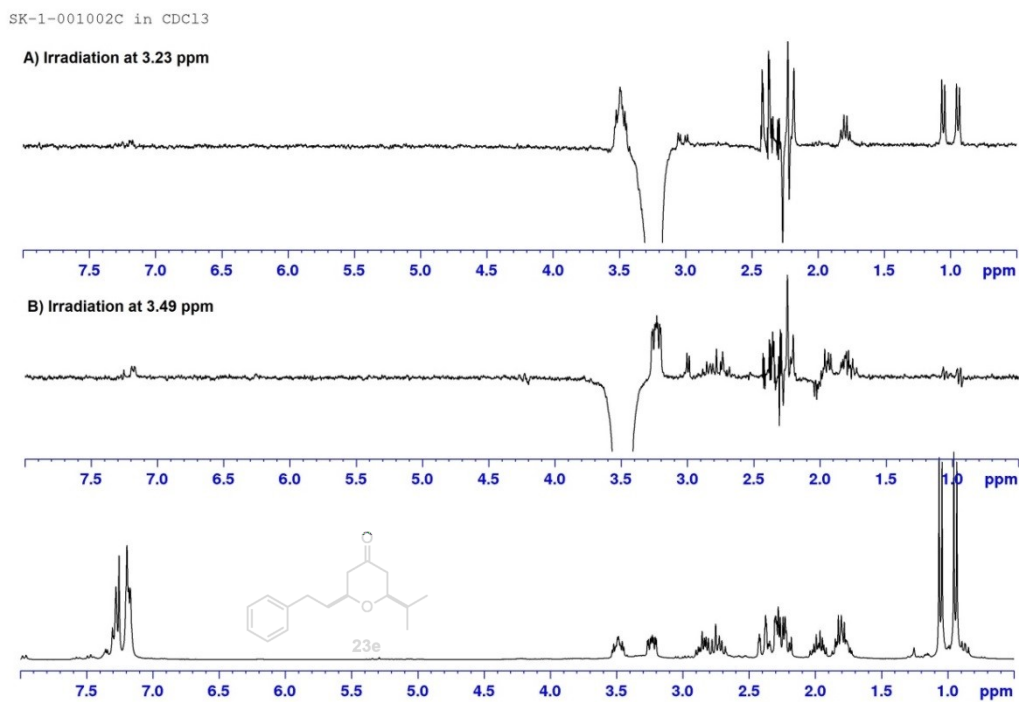

**Figure SI62.** NOE spectra (A) irradiation of  $^1\text{H}$  at 3.73 ppm B) irradiation of  $^1\text{H}$  at 4.61 ppm of 2-phenethyl-6-phenyltetrahydropyran-4-one (**23g**)

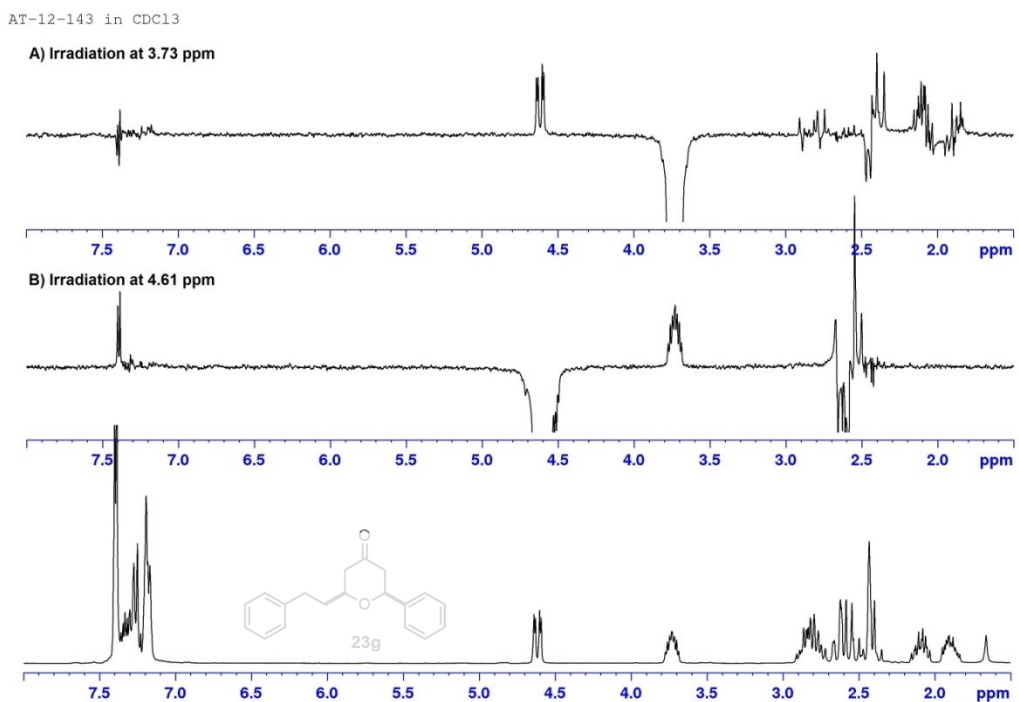

## 5. References

1. X.-H. Yi, Y. Meng and C.-J. Li, *Tetrahedron Lett.*, 1997, **38**, 4731–4734.
2. M. A. Tekle-Smith, K. S. Williamson, I. F. Hughes and J. L. Leighton, *Org. Lett.*, 2017, **19**, 6024–6027.
3. J. Yuan, P. Jain and J. C. Antilla, *J. Org. Chem.*, 2022, **87**, 8256–8266.
